# Supplementary material for: The origin of exo-stereoselectivity of norbornene in hetero Diels–Alder reactions
Source: Royal Society of Chemistry journal article supplement (doi:10.1039/c4ob01217h), 2014-08-15
Supplement: c4ob01217h1.pdf [file c4ob01217h1.pdf]

## ORIGINS OF *exo*-STEREOSELECTIVITY OF NORBORNENE IN HETERO DIELS-ALDER REACTIONS

Sesil Agopcan Cinar,<sup>§</sup> Selami Ercan,<sup>‡</sup> Sule Erol Gunal,<sup>§</sup> Ilknur Dogan,<sup>§\*</sup> Viktorya Aviyente<sup>§\*</sup>

<sup>§</sup> Department of Chemistry, Bogaziçi University, Bebek, Istanbul, 34342, Turkey

<sup>‡</sup> School of Health, Nursing Department, University of Batman, Batman, Turkey

\* Author to whom correspondence should be addressed: aviye@boun.edu.tr,  
dogan@boun.edu.tr

|                                                            |                              |
|------------------------------------------------------------|------------------------------|
| Figure S1 ( <sup>1</sup> H-NMR of 4b).....                 | Error! Bookmark not defined. |
| Figure S2 (STRUCTURES of TS(P,R,S,S) & TS(M,R,S,S)).....   | Error! Bookmark not defined. |
| CARTESIAN COORDINATES (Å) AND ABSOLUTE ENERGIES (au) ..... | 4                            |
| REACTANTS.....                                             | 4                            |
| 1b.....                                                    | 4                            |
| 2b.....                                                    | 9                            |
| 3b.....                                                    | 14                           |
| Norbornene .....                                           | 16                           |
| TRANSITION STATES .....                                    | 17                           |
| TS-rot-1b-O .....                                          | 17                           |
| TS-rot-1b-N .....                                          | 22                           |
| TS-rot-2b-S.....                                           | 27                           |
| TS-rot-2b-N.....                                           | 32                           |
| TS(M,S,R,R)-x .....                                        | 37                           |
| TS(P,S,R,R)-x.....                                         | 39                           |
| TS(M,S,S,S)-x.....                                         | 42                           |
| TS(P,S,S,S)-x .....                                        | 44                           |
| TS(M,S,R,R)-n.....                                         | 46                           |
| TS(P,S,R,R)-n .....                                        | 48                           |
| TS(M,S,S,S)-n .....                                        | 50                           |
| TS(P,S,S,S)-n.....                                         | 52                           |

|                   |    |
|-------------------|----|
| TS-rot-4b-S.....  | 54 |
| TS-rot-4b-N.....  | 56 |
| PRODUCTS .....    | 58 |
| (M,S,R,R)-x.....  | 58 |
| (P,S,R,R)-x ..... | 60 |
| (M,S,S,S)-x.....  | 62 |
| (P,S,S,S)-x.....  | 64 |
| (M,S,R,R)-n.....  | 67 |
| (P,S,R,R)-n.....  | 69 |
| (M,S,S,S)-n ..... | 71 |
| (P,S,S,S)-n.....  | 73 |

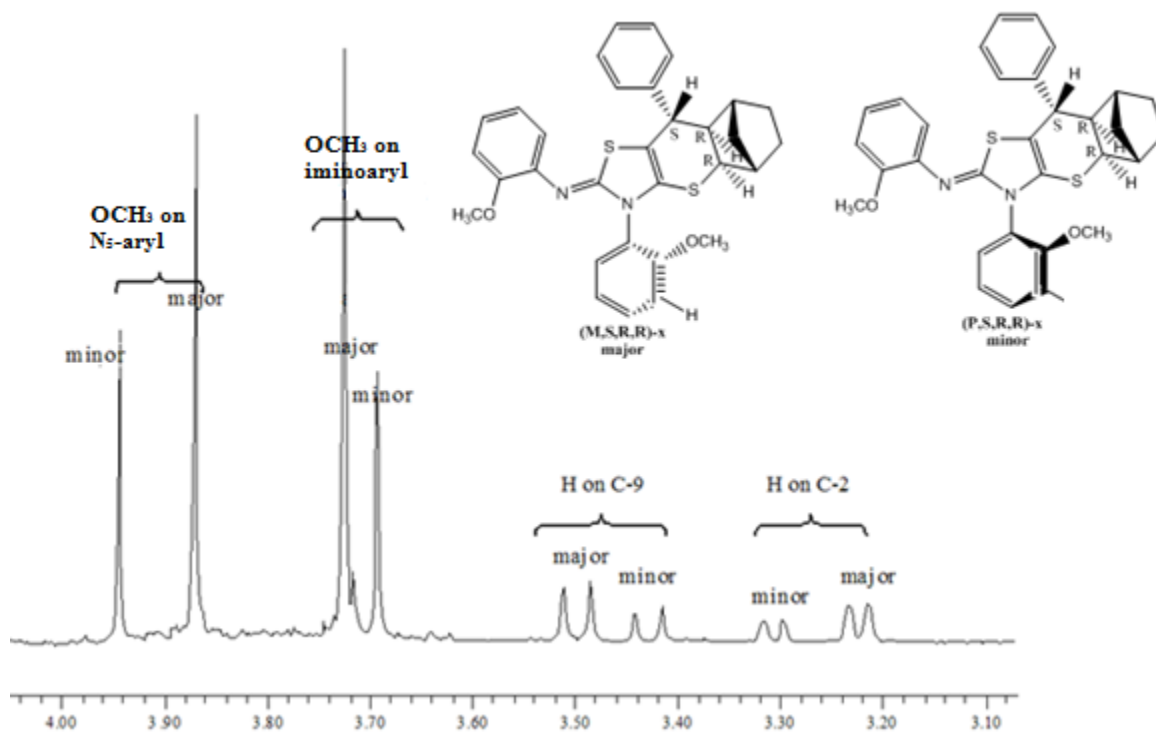

Figure S1. Partial  $^1\text{H}$  NMR spectrum of **4b** in  $\text{CDCl}_3$ . (**(M,S,R,R)-x** and its enantiomer is the major and **(P,S,R,R)-x** and its enantiomer is the minor product. ( $^1\text{H}$  and  $^{13}\text{C}$  NMR spectra of all compounds were recorded on a Varian-Mercury VX-400 MHz-BB in  $\text{CDCl}_3$  at room temperature.)

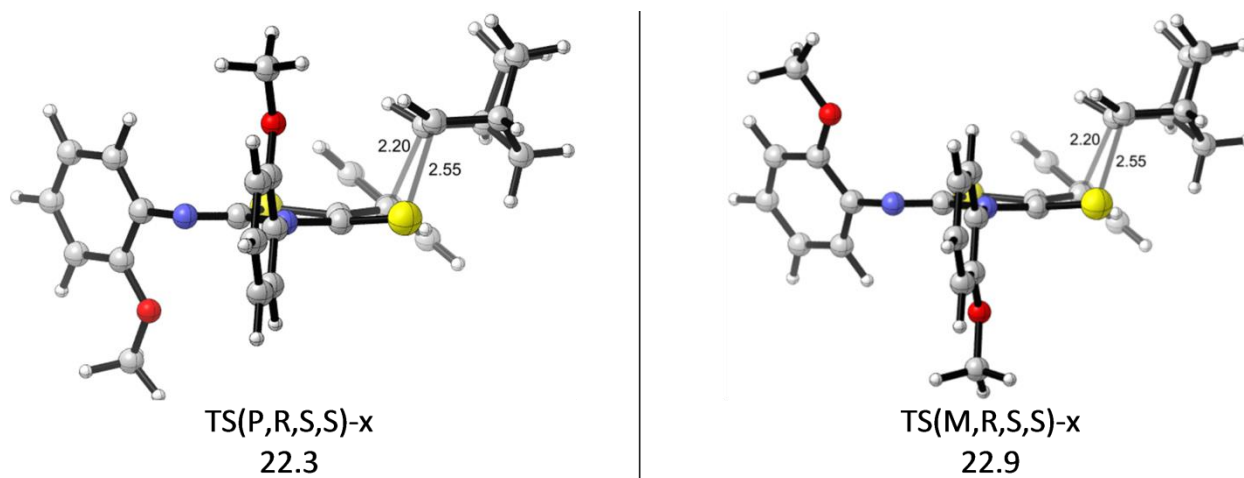

Figure S2. Transition structures for the reaction between **3b** and norbornene and their Gibbs free energies of activation in  $\text{CH}_2\text{Cl}_2$  ( $\Delta G^\ddagger = G(\text{TS}) - G(\mathbf{3}) - G(\text{norbornene})$ ) (M06-2X/6-31+G(d)//B3LYP/6-31+G(d)).

TS(P,R,S,S)-x and TS(M,S,R,R)-x as well as TS(P,S,R,R)-x and TS(M,R,S,S)-x are enantiomers and isoenergetic as expected.

## CARTESIAN COORDINATES (Å) AND ABSOLUTE ENERGIES (au)

### REACTANTS

#### **1b**

B3LYP/6-31+G\*

|   |             |             |             |
|---|-------------|-------------|-------------|
| N | 0.69579500  | -0.45836400 | -0.12786400 |
| C | 2.04193600  | -0.63697400 | -0.50442800 |
| C | 2.37005400  | -1.02587900 | -1.80675300 |
| C | 3.69429300  | -1.29110200 | -2.16970300 |
| C | 4.70410900  | -1.18155000 | -1.21569900 |
| C | 4.39571700  | -0.80745000 | 0.09820000  |
| C | 3.07254300  | -0.53665500 | 0.46183600  |
| H | 1.56563300  | -1.12254500 | -2.53075100 |
| H | 3.92760400  | -1.58509700 | -3.18936400 |
| H | 5.73759600  | -1.38827800 | -1.48104900 |
| H | 5.19233000  | -0.72907900 | 0.82996000  |
| C | -2.01488000 | -0.21876400 | 0.62109700  |
| C | -2.79346400 | -0.79845200 | -0.39848500 |
| C | -3.63408700 | -1.87260300 | -0.08280100 |
| C | -3.68593600 | -2.35398600 | 1.22954300  |
| C | -2.91102900 | -1.77832800 | 2.23594500  |
| C | -2.07411100 | -0.70437800 | 1.92187900  |

|   |             |             |             |
|---|-------------|-------------|-------------|
| H | -4.24626300 | -2.33730000 | -0.84736900 |
| H | -4.34277700 | -3.18930600 | 1.45839900  |
| H | -2.95526200 | -2.15670800 | 3.25272500  |
| H | -1.45567800 | -0.23655500 | 2.68215800  |
| C | -1.66085000 | 2.18634900  | 0.26056800  |
| S | 0.94152600  | 2.25449600  | -0.52921900 |
| C | 0.16753300  | 0.69178400  | -0.09650600 |
| N | -1.16487200 | 0.89120800  | 0.29956300  |
| O | -2.79741800 | 2.50426400  | 0.55261700  |
| C | -0.59768700 | 3.18232900  | -0.18491800 |
| H | -0.44311600 | 3.91917000  | 0.60806400  |
| H | -0.95110200 | 3.70172900  | -1.07973600 |
| O | -2.65910200 | -0.25343300 | -1.63820500 |
| O | 2.67454800  | -0.16965900 | 1.71772700  |
| C | -3.45272700 | -0.77158600 | -2.69972300 |
| H | -3.21909200 | -1.82668600 | -2.89107000 |
| H | -4.52277800 | -0.66114400 | -2.48344000 |
| H | -3.19490600 | -0.17678500 | -3.57737000 |
| C | 3.66010100  | -0.06213200 | 2.73415100  |
| H | 3.12226100  | 0.22750900  | 3.63882700  |
| H | 4.16693900  | -1.02157700 | 2.90305200  |
| H | 4.40441500  | 0.70769500  | 2.49024600  |

|                                              |                             |
|----------------------------------------------|-----------------------------|
| Zero-point correction=                       | 0.303218 (Hartree/Particle) |
| Thermal correction to Energy=                | 0.324144                    |
| Thermal correction to Enthalpy=              | 0.325088                    |
| Thermal correction to Gibbs Free Energy=     | 0.250104                    |
| Sum of electronic and zero-point Energies=   | -1390.524762                |
| Sum of electronic and thermal Energies=      | -1390.503836                |
| Sum of electronic and thermal Enthalpies=    | -1390.502891                |
| Sum of electronic and thermal Free Energies= | -1390.577875                |

B3LYP/6-31+G\* optimized with IEFPCM (toluene;  $\epsilon=2.37$ )

|   |             |             |            |
|---|-------------|-------------|------------|
| N | -0.68928000 | -0.40160100 | 0.16604300 |
| C | -2.03715600 | -0.48786600 | 0.57680500 |
| C | -2.36856500 | -0.51110100 | 1.93533700 |
| C | -3.69267400 | -0.68257200 | 2.35281400 |
| C | -4.69769100 | -0.84508200 | 1.40060100 |
| C | -4.38554400 | -0.83613800 | 0.03506500 |

|   |             |             |             |
|---|-------------|-------------|-------------|
| C | -3.06245400 | -0.66021500 | -0.38480000 |
| H | -1.56855000 | -0.39862300 | 2.66210600  |
| H | -3.92896100 | -0.69237500 | 3.41328600  |
| H | -5.73084800 | -0.98294600 | 1.70845300  |
| H | -5.17884900 | -0.96567500 | -0.69264900 |
| C | 2.03919800  | -0.30554800 | -0.56536200 |
| C | 2.74448200  | -0.74131300 | 0.57318300  |
| C | 3.58126200  | -1.85905800 | 0.46485000  |
| C | 3.70382000  | -2.52119700 | -0.76136400 |
| C | 3.00389200  | -2.08500400 | -1.88671900 |
| C | 2.16859000  | -0.96961500 | -1.78006300 |
| H | 4.13674800  | -2.21696000 | 1.32407100  |
| H | 4.35696600  | -3.38737300 | -0.82851600 |
| H | 3.10369500  | -2.60311300 | -2.83563800 |
| H | 1.60770000  | -0.60807900 | -2.63692200 |
| C | 1.68625800  | 2.12621700  | -0.64313700 |
| S | -0.92028300 | 2.33850300  | 0.09242900  |
| C | -0.14959500 | 0.72415200  | -0.05167900 |
| N | 1.18969500  | 0.84678000  | -0.45693700 |
| O | 2.83182200  | 2.38434400  | -0.96954600 |
| C | 0.62412400  | 3.18786500  | -0.40020700 |
| H | 0.47661800  | 3.76683200  | -1.31577500 |
| H | 0.96622800  | 3.86188200  | 0.38942700  |
| O | 2.54997700  | -0.02209000 | 1.71089400  |
| O | -2.66207100 | -0.63437600 | -1.69123100 |
| C | 3.25417800  | -0.40585700 | 2.89127000  |
| H | 2.97710700  | -1.41989400 | 3.20359400  |
| H | 4.33853600  | -0.34453900 | 2.74007100  |
| H | 2.95138800  | 0.30818900  | 3.65816400  |
| C | -3.64567300 | -0.81198200 | -2.70536100 |
| H | -3.10526500 | -0.76432500 | -3.65211300 |
| H | -4.13872000 | -1.78818600 | -2.61508100 |
| H | -4.39871300 | -0.01427200 | -2.67341100 |

|                                            |                             |
|--------------------------------------------|-----------------------------|
| Zero-point correction=                     | 0.303173 (Hartree/Particle) |
| Thermal correction to Energy=              | 0.324102                    |
| Thermal correction to Enthalpy=            | 0.325046                    |
| Thermal correction to Gibbs Free Energy=   | 0.249970                    |
| Sum of electronic and zero-point Energies= | -1390.532881                |
| Sum of electronic and thermal Energies=    | -1390.511951                |

Sum of electronic and thermal Enthalpies= -1390.511007  
Sum of electronic and thermal Free Energies= -1390.586083

M06-2X/6-31+G(d)// B3LYP/6-31+G(d) (IEFPCM)

HF= -1390.392069

M062X/6-31+G(d) optimized with IEFPCM (toluene;  $\epsilon=2.37$ )

|   |             |             |             |
|---|-------------|-------------|-------------|
| N | 0.56658400  | -0.49391100 | 0.22889800  |
| C | 1.92114600  | -0.85128000 | 0.06200700  |
| C | 2.26933000  | -1.92651500 | -0.75031900 |
| C | 3.60185600  | -2.31893600 | -0.88684400 |
| C | 4.59117700  | -1.63447800 | -0.19064800 |
| C | 4.25951000  | -0.56045400 | 0.63992600  |
| C | 2.92889600  | -0.16405100 | 0.77183800  |
| H | 1.47320700  | -2.44828500 | -1.27441900 |
| H | 3.85816600  | -3.15560900 | -1.52912700 |
| H | 5.63199300  | -1.93030300 | -0.28284000 |
| H | 5.04431500  | -0.04042000 | 1.17756800  |
| C | -2.13553000 | 0.21045500  | 0.50587900  |
| C | -2.60968700 | -0.99448100 | -0.03604900 |
| C | -3.53370600 | -1.74461500 | 0.69272400  |
| C | -3.97870300 | -1.27888900 | 1.93183000  |
| C | -3.51528600 | -0.07735200 | 2.45752500  |
| C | -2.58242000 | 0.66642400  | 1.73515200  |
| H | -3.91375700 | -2.68246900 | 0.30469500  |
| H | -4.70065100 | -1.87125000 | 2.48640000  |
| H | -3.86956200 | 0.27815300  | 3.41915500  |
| H | -2.19231400 | 1.60500600  | 2.11741900  |
| C | -1.56173000 | 2.07547200  | -0.97781300 |
| S | 1.05270700  | 1.59142500  | -1.47062600 |
| C | 0.13550400  | 0.53047000  | -0.37140800 |
| N | -1.18629300 | 0.96709500  | -0.24555400 |
| O | -2.67878700 | 2.54212600  | -0.99538800 |
| C | -0.39369000 | 2.65147700  | -1.75912500 |
| H | -0.20752200 | 3.67134900  | -1.41574800 |
| H | -0.65886700 | 2.67459500  | -2.81775200 |
| O | -2.12214400 | -1.32943200 | -1.25238300 |
| O | 2.50424800  | 0.86334000  | 1.55343000  |
| C | -2.53212800 | -2.56620200 | -1.80856500 |
| H | -2.24379700 | -3.39994100 | -1.15864200 |

|   |             |             |             |
|---|-------------|-------------|-------------|
| H | -3.61502500 | -2.58158400 | -1.97566400 |
| H | -2.01481800 | -2.64970600 | -2.76370700 |
| C | 3.48622400  | 1.60446000  | 2.25103700  |
| H | 2.94762400  | 2.38109800  | 2.79321100  |
| H | 4.02797700  | 0.96989500  | 2.96231400  |
| H | 4.19655600  | 2.06708100  | 1.55558300  |

|                                              |                             |
|----------------------------------------------|-----------------------------|
| Zero-point correction=                       | 0.307695 (Hartree/Particle) |
| Thermal correction to Energy=                | 0.328213                    |
| Thermal correction to Enthalpy=              | 0.329157                    |
| Thermal correction to Gibbs Free Energy=     | 0.256127                    |
| Sum of electronic and zero-point Energies=   | -1390.086225                |
| Sum of electronic and thermal Energies=      | -1390.065707                |
| Sum of electronic and thermal Enthalpies=    | -1390.064763                |
| Sum of electronic and thermal Free Energies= | -1390.137794                |

M062X/6-311G(d,p) optimized with IEFPCM (toluene;  $\epsilon=2.37$ )

|   |             |             |             |
|---|-------------|-------------|-------------|
| N | 0.56308200  | -0.48989800 | 0.23738800  |
| C | 1.91555300  | -0.85250700 | 0.07476300  |
| C | 2.26156600  | -1.92919600 | -0.73098100 |
| C | 3.59108100  | -2.32202700 | -0.86617100 |
| C | 4.57878100  | -1.63567800 | -0.17747800 |
| C | 4.24971200  | -0.55794400 | 0.64456300  |
| C | 2.92274600  | -0.15963000 | 0.77626900  |
| H | 1.46495300  | -2.45181200 | -1.24803600 |
| H | 3.84587900  | -3.16036900 | -1.50232200 |
| H | 5.61648400  | -1.93237900 | -0.26916700 |
| H | 5.03432500  | -0.03591000 | 1.17554000  |
| C | -2.13766000 | 0.21158200  | 0.49915800  |
| C | -2.59923500 | -0.99900500 | -0.03604700 |
| C | -3.52720300 | -1.74301000 | 0.68890000  |
| C | -3.99076100 | -1.26563000 | 1.91340900  |
| C | -3.54224800 | -0.05861500 | 2.42921800  |
| C | -2.60484900 | 0.67951800  | 1.71261800  |
| H | -3.89703000 | -2.68534800 | 0.30873500  |
| H | -4.71538000 | -1.85336600 | 2.46407700  |
| H | -3.91058500 | 0.30556800  | 3.37936900  |
| H | -2.22468400 | 1.62193900  | 2.08795600  |
| C | -1.56143900 | 2.07317000  | -0.98571600 |
| S | 1.05584800  | 1.58605400  | -1.46701400 |



|   |             |             |             |
|---|-------------|-------------|-------------|
| C | 0.13520900  | 0.52826500  | -0.36536200 |
| N | -1.18488200 | 0.96556900  | -0.24994400 |
| O | -2.67053600 | 2.53477700  | -1.00847400 |
| C | -0.38775700 | 2.64533900  | -1.75970200 |
| H | -0.20267500 | 3.66125500  | -1.41320400 |
| H | -0.64821000 | 2.66633300  | -2.81669200 |
| O | -2.09558800 | -1.34389000 | -1.24016800 |
| O | 2.49900000  | 0.87387700  | 1.54569000  |
| C | -2.48756100 | -2.59257700 | -1.78296200 |
| H | -2.19953800 | -3.41325500 | -1.12010800 |
| H | -3.56602100 | -2.62210100 | -1.96190200 |
| H | -1.96071300 | -2.68506400 | -2.72927300 |
| C | 3.48299900  | 1.62385500  | 2.23031900  |
| H | 2.94774600  | 2.40409400  | 2.76592100  |
| H | 4.02900800  | 1.00040800  | 2.94489300  |
| H | 4.18885000  | 2.07987000  | 1.52918000  |

|                                              |                             |
|----------------------------------------------|-----------------------------|
| Zero-point correction=                       | 0.306127 (Hartree/Particle) |
| Thermal correction to Energy=                | 0.326630                    |
| Thermal correction to Enthalpy=              | 0.327575                    |
| Thermal correction to Gibbs Free Energy=     | 0.254502                    |
| Sum of electronic and zero-point Energies=   | -1390.343178                |
| Sum of electronic and thermal Energies=      | -1390.322674                |
| Sum of electronic and thermal Enthalpies=    | -1390.321730                |
| Sum of electronic and thermal Free Energies= | -1390.394802                |

## **2b**

B3LYP/6-31+G\*

|   |             |             |             |
|---|-------------|-------------|-------------|
| N | 0.85303500  | -0.54158300 | -0.00020700 |
| C | 2.21905100  | -0.74341300 | -0.28146700 |
| C | 2.60233900  | -1.56510100 | -1.34573700 |
| C | 3.95007600  | -1.83976600 | -1.59677800 |
| C | 4.92840800  | -1.30328800 | -0.76169800 |
| C | 4.56499900  | -0.49476100 | 0.32226100  |
| C | 3.21779700  | -0.21252900 | 0.57127500  |
| H | 1.82222700  | -1.98593700 | -1.97399600 |
| H | 4.22649400  | -2.47217600 | -2.43587600 |
| H | 5.98005100  | -1.51092000 | -0.94086900 |
| H | 5.33755300  | -0.09015400 | 0.96682700  |
| C | -1.84228900 | -0.30458500 | 0.64763700  |

|   |             |             |             |
|---|-------------|-------------|-------------|
| C | -2.48967600 | -1.24840900 | -0.17035000 |
| C | -3.22221000 | -2.27675700 | 0.43428400  |
| C | -3.29390400 | -2.35391900 | 1.82897600  |
| C | -2.64409200 | -1.41878300 | 2.63412500  |
| C | -1.91470300 | -0.39050600 | 2.03221700  |
| H | -3.73467200 | -3.01711900 | -0.16946800 |
| H | -3.86603700 | -3.15896400 | 2.28294000  |
| H | -2.70201700 | -1.48522500 | 3.71629200  |
| H | -1.39675500 | 0.35273100  | 2.63096700  |
| C | -1.66368300 | 1.94054600  | -0.34080000 |
| S | 0.95060000  | 1.97397200  | -1.11725100 |
| C | 0.27184900  | 0.54515900  | -0.28938200 |
| N | -1.09353900 | 0.75408800  | 0.02605100  |
| C | -0.66192400 | 2.84873100  | -1.02668900 |
| H | -0.55915900 | 3.77802700  | -0.46108500 |
| H | -1.01785200 | 3.09426500  | -2.03011800 |
| O | -2.34383700 | -1.07921800 | -1.51180100 |
| O | 2.76659400  | 0.55565900  | 1.60853500  |
| C | -3.01229700 | -1.97874100 | -2.38902700 |
| H | -2.65575600 | -3.00718100 | -2.24913500 |
| H | -4.09904700 | -1.93875100 | -2.24304000 |
| H | -2.76734200 | -1.64231500 | -3.39759900 |
| C | 3.72011000  | 1.13383800  | 2.48788000  |
| H | 3.14197000  | 1.70025000  | 3.22024100  |
| H | 4.30712100  | 0.36297300  | 3.00472100  |
| H | 4.39674300  | 1.81305000  | 1.95240200  |
| S | -3.23129700 | 2.39365900  | -0.09327000 |

|                                              |                             |
|----------------------------------------------|-----------------------------|
| Zero-point correction=                       | 0.300772 (Hartree/Particle) |
| Thermal correction to Energy=                | 0.322123                    |
| Thermal correction to Enthalpy=              | 0.323067                    |
| Thermal correction to Gibbs Free Energy=     | 0.247008                    |
| Sum of electronic and zero-point Energies=   | -1713.476429                |
| Sum of electronic and thermal Energies=      | -1713.455077                |
| Sum of electronic and thermal Enthalpies=    | -1713.454133                |
| Sum of electronic and thermal Free Energies= | -1713.530192                |

B3LYP/6-31+G\* optimized with IEFPCM (toluene;  $\epsilon=2.37$ )

|   |          |           |          |
|---|----------|-----------|----------|
| N | 0.850020 | -0.517945 | 0.003819 |
|---|----------|-----------|----------|

|   |           |           |           |
|---|-----------|-----------|-----------|
| C | 2.216436  | -0.711977 | -0.293516 |
| C | 2.593590  | -1.483558 | -1.396948 |
| C | 3.940176  | -1.753917 | -1.661458 |
| C | 4.921606  | -1.261250 | -0.802557 |
| C | 4.563524  | -0.500416 | 0.317508  |
| C | 3.217533  | -0.223134 | 0.581159  |
| H | 1.811756  | -1.871264 | -2.044273 |
| H | 4.212626  | -2.348746 | -2.528823 |
| H | 5.972079  | -1.466104 | -0.991472 |
| H | 5.338635  | -0.128551 | 0.978305  |
| C | -1.853861 | -0.282432 | 0.641702  |
| C | -2.486090 | -1.251348 | -0.159522 |
| C | -3.215348 | -2.270682 | 0.465479  |
| C | -3.299346 | -2.312524 | 1.861093  |
| C | -2.664957 | -1.351345 | 2.648999  |
| C | -1.938051 | -0.332592 | 2.027936  |
| H | -3.715636 | -3.030605 | -0.123760 |
| H | -3.868871 | -3.110732 | 2.329898  |
| H | -2.732440 | -1.390752 | 3.731864  |
| H | -1.432006 | 0.429775  | 2.612767  |
| C | -1.673134 | 1.948686  | -0.376939 |
| S | 0.934749  | 1.972769  | -1.162231 |
| C | 0.261089  | 0.558674  | -0.309439 |
| N | -1.106675 | 0.767557  | 0.001498  |
| C | -0.675742 | 2.850809  | -1.073499 |
| H | -0.567330 | 3.784187  | -0.515926 |
| H | -1.032333 | 3.088320  | -2.078446 |
| O | -2.331168 | -1.114778 | -1.502974 |
| O | 2.771602  | 0.502293  | 1.650087  |
| C | -2.968245 | -2.058336 | -2.363724 |
| H | -2.590970 | -3.072176 | -2.183950 |
| H | -4.056838 | -2.036077 | -2.234405 |
| H | -2.714085 | -1.747737 | -3.377859 |
| C | 3.730820  | 1.021230  | 2.565914  |
| H | 3.155815  | 1.554195  | 3.324781  |
| H | 4.303808  | 0.214882  | 3.040875  |
| H | 4.417156  | 1.718787  | 2.069388  |
| S | -3.244965 | 2.403667  | -0.129366 |

Zero-point correction=

0.300706 (Hartree/Particle)

|                                              |              |
|----------------------------------------------|--------------|
| Thermal correction to Energy=                | 0.322070     |
| Thermal correction to Enthalpy=              | 0.323014     |
| Thermal correction to Gibbs Free Energy=     | 0.246769     |
| Sum of electronic and zero-point Energies=   | -1713.483635 |
| Sum of electronic and thermal Energies=      | -1713.462271 |
| Sum of electronic and thermal Enthalpies=    | -1713.461326 |
| Sum of electronic and thermal Free Energies= | -1713.537572 |

M06-2X/6-31+G(d)// B3LYP/6-31+G(d) (IEFPCM)

HF=-1713.3340227

M062X/6-31+G(d) optimized with IEFPCM (toluene;  $\epsilon=2.37$ )

|   |             |             |             |
|---|-------------|-------------|-------------|
| N | 0.82364900  | -0.64989800 | 0.09569800  |
| C | 2.18933300  | -0.87034000 | -0.18101900 |
| C | 2.56497800  | -1.80311700 | -1.14325300 |
| C | 3.91202000  | -2.06202700 | -1.40057100 |
| C | 4.88924500  | -1.39325500 | -0.67252000 |
| C | 4.53096800  | -0.46884500 | 0.31198900  |
| C | 3.18515000  | -0.20449000 | 0.56564300  |
| H | 1.78010400  | -2.31793300 | -1.68991800 |
| H | 4.18914000  | -2.78368900 | -2.16266400 |
| H | 5.94129900  | -1.58664200 | -0.85945100 |
| H | 5.30651600  | 0.03831500  | 0.87469300  |
| C | -1.85765400 | -0.26022300 | 0.67400200  |
| C | -2.54474500 | -1.16182100 | -0.15038200 |
| C | -3.34714200 | -2.13691300 | 0.44343500  |
| C | -3.44131900 | -2.19862500 | 1.83527100  |
| C | -2.74929200 | -1.30448900 | 2.64584600  |
| C | -1.95033200 | -0.32715000 | 2.05315700  |
| H | -3.89736300 | -2.84619600 | -0.16387600 |
| H | -4.06910300 | -2.96281300 | 2.28425100  |
| H | -2.82845600 | -1.36343400 | 3.72611700  |
| H | -1.39406900 | 0.38958000  | 2.65036700  |
| C | -1.55532400 | 1.91366600  | -0.40406500 |
| S | 1.06169000  | 1.79987700  | -1.10161300 |
| C | 0.30414200  | 0.45228200  | -0.23674800 |
| N | -1.04732200 | 0.73953800  | 0.04757700  |
| C | -0.49960700 | 2.73879300  | -1.10508000 |
| H | -0.37468300 | 3.68930300  | -0.58288200 |

|   |             |             |             |
|---|-------------|-------------|-------------|
| H | -0.82225200 | 2.94001100  | -2.12833800 |
| O | -2.36475000 | -1.00273700 | -1.48140900 |
| O | 2.73464200  | 0.66576000  | 1.50716600  |
| C | -3.07705800 | -1.86795700 | -2.34924400 |
| H | -2.78830900 | -2.91190600 | -2.18376700 |
| H | -4.15781500 | -1.75333900 | -2.21058600 |
| H | -2.80315300 | -1.56837700 | -3.35993000 |
| C | 3.69637800  | 1.40895800  | 2.23099000  |
| H | 3.13074400  | 2.05991900  | 2.89706300  |
| H | 4.34054700  | 0.74990200  | 2.82458600  |
| H | 4.31105400  | 2.01752400  | 1.55730000  |
| S | -3.10894500 | 2.42208700  | -0.23505300 |

|                                              |                             |
|----------------------------------------------|-----------------------------|
| Zero-point correction=                       | 0.304833 (Hartree/Particle) |
| Thermal correction to Energy=                | 0.325829                    |
| Thermal correction to Enthalpy=              | 0.326774                    |
| Thermal correction to Gibbs Free Energy=     | 0.251811                    |
| Sum of electronic and zero-point Energies=   | -1713.031160                |
| Sum of electronic and thermal Energies=      | -1713.010164                |
| Sum of electronic and thermal Enthalpies=    | -1713.009219                |
| Sum of electronic and thermal Free Energies= | -1713.084183                |

M062X/6-311G(d,p) optimized with IEFPCM (toluene;  $\epsilon=2.37$ )

|   |             |             |             |
|---|-------------|-------------|-------------|
| N | 0.82200300  | -0.64341700 | 0.09756500  |
| C | 2.18543900  | -0.86671000 | -0.18419200 |
| C | 2.55563300  | -1.78317900 | -1.15922900 |
| C | 3.89888700  | -2.03956700 | -1.42290000 |
| C | 4.87617200  | -1.38359500 | -0.69075300 |
| C | 4.52319000  | -0.47287600 | 0.30435400  |
| C | 3.18168500  | -0.20949900 | 0.56561900  |
| H | 1.76888300  | -2.28821200 | -1.70703600 |
| H | 4.17233600  | -2.74905600 | -2.19359800 |
| H | 5.92469600  | -1.57602400 | -0.88288800 |
| H | 5.29955200  | 0.02525600  | 0.86908500  |
| C | -1.85405900 | -0.26425300 | 0.67874500  |
| C | -2.53547400 | -1.15920700 | -0.15355600 |
| C | -3.33482100 | -2.13809600 | 0.43152300  |
| C | -3.42987300 | -2.20994300 | 1.81985500  |
| C | -2.74140500 | -1.32397100 | 2.63611000  |
| C | -1.94481200 | -0.34260000 | 2.05378700  |

|   |             |             |             |
|---|-------------|-------------|-------------|
| H | -3.88152600 | -2.84264700 | -0.17972400 |
| H | -4.05522700 | -2.97638400 | 2.26176400  |
| H | -2.82069400 | -1.39211800 | 3.71311000  |
| H | -1.39026400 | 0.36801500  | 2.65469000  |
| C | -1.55971000 | 1.90950000  | -0.39473200 |
| S | 1.05833900  | 1.81171900  | -1.08357800 |
| C | 0.30468600  | 0.45561600  | -0.22752700 |
| N | -1.04696600 | 0.74100500  | 0.05738000  |
| C | -0.50770600 | 2.74049000  | -1.09025900 |
| H | -0.38940900 | 3.68685700  | -0.56526200 |
| H | -0.82710400 | 2.93661400  | -2.11234600 |
| O | -2.35176000 | -0.98747400 | -1.47959800 |
| O | 2.73301500  | 0.65114600  | 1.51304900  |
| C | -3.05945000 | -1.84817400 | -2.35605400 |
| H | -2.76791800 | -2.89058300 | -2.20006000 |
| H | -4.13895500 | -1.74020500 | -2.21926900 |
| H | -2.78636500 | -1.53993600 | -3.36175900 |
| C | 3.69768700  | 1.38595800  | 2.24149400  |
| H | 3.13692800  | 2.03102100  | 2.91349200  |
| H | 4.34117700  | 0.72253000  | 2.82703600  |
| H | 4.31175500  | 1.99859600  | 1.57450300  |
| S | -3.11518800 | 2.40918200  | -0.23252600 |

|                                              |                             |
|----------------------------------------------|-----------------------------|
| Zero-point correction=                       | 0.303101 (Hartree/Particle) |
| Thermal correction to Energy=                | 0.324154                    |
| Thermal correction to Enthalpy=              | 0.325098                    |
| Thermal correction to Gibbs Free Energy=     | 0.249766                    |
| Sum of electronic and zero-point Energies=   | -1713.297410                |
| Sum of electronic and thermal Energies=      | -1713.276358                |
| Sum of electronic and thermal Enthalpies=    | -1713.275413                |
| Sum of electronic and thermal Free Energies= | -1713.350746                |

### **3b**

B3LYP/6-31+G\* optimized with IEFPCM (dichloromethane;  $\epsilon=8.93$ )

|   |             |             |             |
|---|-------------|-------------|-------------|
| C | -3.04860100 | -1.12987500 | -0.35723200 |
| C | -1.73556100 | -0.79173800 | -0.26405300 |
| C | -4.27256600 | -0.35659000 | -0.21180100 |
| C | -0.64763700 | -1.77199100 | -0.45306400 |
| S | -1.07695100 | 0.81612600  | 0.10897700  |
| C | -5.49043800 | -1.07338500 | -0.29097900 |

|   |             |             |             |
|---|-------------|-------------|-------------|
| C | -4.34256600 | 1.04003700  | -0.00493200 |
| S | -0.84069800 | -3.39517500 | -0.79267000 |
| N | 0.58155600  | -1.16832400 | -0.31323700 |
| C | 0.59787500  | 0.20495000  | -0.01635600 |
| C | 1.82533700  | -1.88679400 | -0.39589800 |
| C | -6.71910300 | -0.43121500 | -0.16090000 |
| C | -5.57408200 | 1.68096700  | 0.12230100  |
| C | -6.76621700 | 0.95175700  | 0.04755400  |
| N | 1.67667800  | 0.86304300  | 0.10425200  |
| C | 1.66677300  | 2.22542600  | 0.46751200  |
| C | 1.27649800  | 2.64054700  | 1.74684200  |
| C | 1.36469200  | 3.98414600  | 2.12692400  |
| C | 1.85289900  | 4.92390200  | 1.21983300  |
| C | 2.25662400  | 4.52805900  | -0.06212700 |
| C | 2.17312400  | 3.18458300  | -0.44441000 |
| C | 2.47983100  | -2.01065300 | -1.61664700 |
| C | 3.68869600  | -2.70711800 | -1.69567400 |
| C | 4.22824200  | -3.26943000 | -0.53718400 |
| C | 3.57939900  | -3.14241700 | 0.69573500  |
| C | 2.36799900  | -2.44347000 | 0.77807600  |
| O | 2.53719500  | 2.70588000  | -1.66942400 |
| C | 3.08694000  | 3.61818000  | -2.62056900 |
| O | 1.65435600  | -2.25349600 | 1.91870200  |
| C | 2.15041500  | -2.81056800 | 3.13943100  |
| H | -3.20368800 | -2.18456800 | -0.57558400 |
| H | -5.45993100 | -2.14768400 | -0.45434600 |
| H | -3.44271300 | 1.64134700  | 0.04816400  |
| H | -7.63849700 | -1.00684500 | -0.22342900 |
| H | -5.60257400 | 2.75586000  | 0.27850600  |
| H | -7.72253400 | 1.45773200  | 0.14818600  |
| H | 0.92119100  | 1.89293700  | 2.45084100  |
| H | 1.05962200  | 4.28459500  | 3.12535500  |
| H | 1.92839200  | 5.97123800  | 1.49969100  |
| H | 2.63451400  | 5.27211900  | -0.75412300 |
| H | 2.03473400  | -1.56212600 | -2.49994600 |
| H | 4.19889600  | -2.80680100 | -2.64881300 |
| H | 5.16716300  | -3.81471300 | -0.58336300 |
| H | 4.02032500  | -3.58562800 | 1.58106200  |
| H | 3.32300700  | 3.01811100  | -3.50031200 |
| H | 2.36041600  | 4.39417100  | -2.89006400 |

|   |            |             |             |
|---|------------|-------------|-------------|
| H | 4.00232000 | 4.08483300  | -2.23743300 |
| H | 1.42028700 | -2.53832800 | 3.90212500  |
| H | 2.22252800 | -3.90192600 | 3.07108300  |
| H | 3.12744500 | -2.38551900 | 3.39586800  |

|                                              |                             |
|----------------------------------------------|-----------------------------|
| Zero-point correction=                       | 0.386765 (Hartree/Particle) |
| Thermal correction to Energy=                | 0.413620                    |
| Thermal correction to Enthalpy=              | 0.414564                    |
| Thermal correction to Gibbs Free Energy=     | 0.325281                    |
| Sum of electronic and zero-point Energies=   | -1982.563116                |
| Sum of electronic and thermal Energies=      | -1982.536261                |
| Sum of electronic and thermal Enthalpies=    | -1982.535317                |
| Sum of electronic and thermal Free Energies= | -1982.624600                |

M06-2X/6-31+G(d)// B3LYP/6-31+G(d) (IEFPCM)

HF= -272.6050298

### **Norbornene**

B3LYP/6-31+G\* optimized with IEFPCM (dichloromethane;  $\epsilon=8.93$ )

|   |             |             |             |
|---|-------------|-------------|-------------|
| C | 1.28079800  | 0.67217800  | -0.50529500 |
| C | 0.08784300  | 1.12988000  | 0.32368400  |
| C | 1.28079400  | -0.67218100 | -0.50530000 |
| C | 0.08783700  | -1.12988200 | 0.32367800  |
| C | -1.19012700 | 0.78120400  | -0.51911700 |
| C | -1.19013400 | -0.78119500 | -0.51911700 |
| H | 1.92266500  | -1.33027200 | -1.08473000 |
| H | 1.92267300  | 1.33026800  | -1.08472100 |
| H | -2.08719400 | 1.17854200  | -0.02961000 |
| H | -1.14337000 | 1.20812400  | -1.52604800 |
| H | -2.08720000 | -1.17852300 | -0.02960100 |
| H | -1.14339100 | -1.20811700 | -1.52604800 |
| C | 0.03656800  | -0.00000400 | 1.38108500  |
| H | -0.88684600 | -0.00000400 | 1.97422700  |
| H | 0.90411400  | -0.00000800 | 2.04998200  |
| H | 0.11854500  | 2.15944600  | 0.68942800  |
| H | 0.11853500  | -2.15945100 | 0.68941400  |

|                               |                             |
|-------------------------------|-----------------------------|
| Zero-point correction=        | 0.152929 (Hartree/Particle) |
| Thermal correction to Energy= | 0.158158                    |



|                                              |             |
|----------------------------------------------|-------------|
| Thermal correction to Enthalpy=              | 0.159103    |
| Thermal correction to Gibbs Free Energy=     | 0.124399    |
| Sum of electronic and zero-point Energies=   | -272.584021 |
| Sum of electronic and thermal Energies=      | -272.578792 |
| Sum of electronic and thermal Enthalpies=    | -272.577848 |
| Sum of electronic and thermal Free Energies= | -272.612551 |

M06-2X/6-31+G(d)// B3LYP/6-31+G(d) (IEFPCM)  
HF= -1982.3767844

## TRANSITION STATES

### TS-rot-1b-O

B3LYP/6-31+G\*

|   |             |             |             |
|---|-------------|-------------|-------------|
| N | 0.98936800  | -0.35046700 | -0.08940700 |
| C | 2.37490800  | -0.35713300 | -0.31836600 |
| C | 2.91909400  | -0.30467300 | -1.60721100 |
| C | 4.29833800  | -0.41443400 | -1.81519700 |
| C | 5.14592300  | -0.58305900 | -0.72303000 |
| C | 4.62228800  | -0.64532400 | 0.57521700  |
| C | 3.24462500  | -0.53900200 | 0.78662400  |
| H | 2.24516700  | -0.19452900 | -2.45264700 |
| H | 4.69791200  | -0.37298000 | -2.82461600 |
| H | 6.21950500  | -0.67041900 | -0.86771200 |
| H | 5.29609200  | -0.77618700 | 1.41474000  |
| C | -1.94993700 | -0.52628600 | -0.30148700 |
| C | -3.31301700 | -0.64701900 | 0.09554400  |
| C | -3.97892900 | -1.87265500 | -0.06753200 |
| C | -3.36406300 | -2.97016800 | -0.66358500 |
| C | -2.05888500 | -2.84014000 | -1.12430500 |
| C | -1.37740900 | -1.63797600 | -0.94299000 |
| H | -5.00778100 | -1.95664500 | 0.26116000  |
| H | -3.91098100 | -3.90240300 | -0.77603000 |
| H | -1.55306900 | -3.66524600 | -1.61717200 |
| H | -0.35867200 | -1.57958100 | -1.29004400 |
| C | -1.55200500 | 2.01508800  | 0.15428400  |
| S | 0.89854900  | 2.24745700  | -0.92234100 |
| C | 0.26393200  | 0.65237800  | -0.35866300 |
| N | -1.14615000 | 0.68237300  | -0.18060400 |
| O | -2.38888500 | 2.35648900  | 0.95249700  |

|   |             |             |             |
|---|-------------|-------------|-------------|
| C | -0.71329900 | 3.03166300  | -0.60560100 |
| H | -0.60425800 | 3.93301500  | -0.00094400 |
| H | -1.21702000 | 3.28295400  | -1.54572600 |
| O | -3.95466300 | 0.44295400  | 0.58004700  |
| O | 2.64325300  | -0.58080500 | 2.00938900  |
| C | -5.27591600 | 0.33343000  | 1.08446200  |
| H | -5.98908400 | 0.06186300  | 0.29452500  |
| H | -5.33395800 | -0.39800400 | 1.90103500  |
| H | -5.51731000 | 1.32639200  | 1.46769500  |
| C | 3.45270500  | -0.79193800 | 3.15726000  |
| H | 2.76375800  | -0.81221800 | 4.00346700  |
| H | 3.98816700  | -1.74888600 | 3.09851800  |
| H | 4.17447000  | 0.02460900  | 3.29326000  |

|                                              |                             |
|----------------------------------------------|-----------------------------|
| Zero-point correction=                       | 0.302672 (Hartree/Particle) |
| Thermal correction to Energy=                | 0.322707                    |
| Thermal correction to Enthalpy=              | 0.323652                    |
| Thermal correction to Gibbs Free Energy=     | 0.252121                    |
| Sum of electronic and zero-point Energies=   | -1390.487215                |
| Sum of electronic and thermal Energies=      | -1390.467180                |
| Sum of electronic and thermal Enthalpies=    | -1390.466236                |
| Sum of electronic and thermal Free Energies= | -1390.537766                |

B3LYP/6-31+G\* optimized with IEFPCM (toluene;  $\epsilon=2.37$ )

|   |             |             |             |
|---|-------------|-------------|-------------|
| N | 0.95061700  | -0.38125900 | -0.07466600 |
| C | 2.34082200  | -0.40404500 | -0.28973000 |
| C | 2.89100200  | -0.47792800 | -1.57513200 |
| C | 4.27213000  | -0.59989400 | -1.76382100 |
| C | 5.11413700  | -0.65322100 | -0.65489500 |
| C | 4.58378300  | -0.58807100 | 0.64058100  |
| C | 3.20389700  | -0.46880800 | 0.83304400  |
| H | 2.22098100  | -0.45804100 | -2.43056400 |
| H | 4.67747200  | -0.65763300 | -2.77009600 |
| H | 6.18898500  | -0.74828700 | -0.78417400 |
| H | 5.25354000  | -0.63021800 | 1.49213000  |
| C | -1.99915300 | -0.55120500 | -0.32549500 |
| C | -3.37294000 | -0.62941600 | 0.02382600  |
| C | -4.05739400 | -1.84909900 | -0.09662900 |
| C | -3.44945500 | -2.99949800 | -0.58130400 |
| C | -2.11636500 | -2.91848600 | -0.98309700 |

|   |             |             |             |
|---|-------------|-------------|-------------|
| C | -1.41862100 | -1.72142800 | -0.86106000 |
| H | -5.10964400 | -1.84904500 | 0.17386900  |
| H | -4.00993200 | -3.92599800 | -0.66940400 |
| H | -1.60605900 | -3.78301400 | -1.39843900 |
| H | -0.38833700 | -1.70466300 | -1.17708000 |
| C | -1.59072400 | 1.99430900  | -0.05939600 |
| S | 0.88107500  | 2.14454700  | -1.10761800 |
| C | 0.23524900  | 0.60067200  | -0.43588400 |
| N | -1.17836400 | 0.64922400  | -0.28117500 |
| O | -2.47616400 | 2.37443400  | 0.66997200  |
| C | -0.72132800 | 2.96668900  | -0.83819100 |
| H | -0.60157000 | 3.88821700  | -0.26694500 |
| H | -1.20863100 | 3.19292900  | -1.79265600 |
| O | -4.13474000 | 0.45601800  | 0.37656400  |
| O | 2.59652600  | -0.39100500 | 2.05149600  |
| C | -4.46846100 | 0.55914900  | 1.76581900  |
| H | -5.02749900 | -0.32435000 | 2.09973600  |
| H | -3.56478700 | 0.68072700  | 2.37275000  |
| H | -5.09258200 | 1.44900300  | 1.86253100  |
| C | 3.40430800  | -0.48099400 | 3.22135400  |
| H | 2.71168400  | -0.41873000 | 4.06203000  |
| H | 3.94276300  | -1.43626400 | 3.26022700  |
| H | 4.12033600  | 0.34893100  | 3.27466900  |

|                                              |                             |
|----------------------------------------------|-----------------------------|
| Zero-point correction=                       | 0.302337 (Hartree/Particle) |
| Thermal correction to Energy=                | 0.322412                    |
| Thermal correction to Enthalpy=              | 0.323356                    |
| Thermal correction to Gibbs Free Energy=     | 0.252162                    |
| Sum of electronic and zero-point Energies=   | -1390.493691                |
| Sum of electronic and thermal Energies=      | -1390.473616                |
| Sum of electronic and thermal Enthalpies=    | -1390.472672                |
| Sum of electronic and thermal Free Energies= | -1390.543866                |

M06-2X/6-31+G(d)// B3LYP/6-31+G(d) (IEFPCM)

HF=-1390.3543234

M062X/6-31+G(d) optimized with IEFPCM (toluene;  $\epsilon=2.37$ )

|   |             |            |             |
|---|-------------|------------|-------------|
| N | -0.94760800 | 0.53815300 | -0.00119300 |
| C | -2.33715400 | 0.58060100 | -0.22958900 |

|   |             |             |             |
|---|-------------|-------------|-------------|
| C | -2.86262700 | 0.92839000  | -1.47140500 |
| C | -4.24234500 | 1.03276300  | -1.66056100 |
| C | -5.09804300 | 0.79014700  | -0.59347300 |
| C | -4.58799900 | 0.44233300  | 0.66101900  |
| C | -3.21085700 | 0.33681500  | 0.85079900  |
| H | -2.17286600 | 1.12514700  | -2.28857800 |
| H | -4.63644300 | 1.30593200  | -2.63433600 |
| H | -6.17323000 | 0.86907700  | -0.72410400 |
| H | -5.27164100 | 0.25269000  | 1.48074500  |
| C | 1.97982900  | 0.57079400  | -0.19242300 |
| C | 3.33941500  | 0.52048100  | 0.20696500  |
| C | 4.08253600  | 1.70304300  | 0.29649800  |
| C | 3.54242900  | 2.93161800  | -0.06387600 |
| C | 2.24288200  | 2.97891600  | -0.54533100 |
| C | 1.48515300  | 1.81337400  | -0.60838700 |
| H | 5.11062600  | 1.65396100  | 0.63364000  |
| H | 4.14584400  | 3.83089400  | 0.01332900  |
| H | 1.79936700  | 3.91485000  | -0.86923600 |
| H | 0.47348400  | 1.88748300  | -0.97446600 |
| C | 1.42816500  | -1.97703300 | -0.21779300 |
| S | -1.01943900 | -1.85433600 | -1.26112300 |
| C | -0.28187300 | -0.43940200 | -0.44588600 |
| N | 1.11503600  | -0.58524800 | -0.29738400 |
| O | 2.21457100  | -2.51122900 | 0.51331300  |
| C | 0.54078900  | -2.76412200 | -1.16376200 |
| H | 0.39033600  | -3.76571000 | -0.76309500 |
| H | 1.02244600  | -2.82117800 | -2.14417600 |
| O | 3.89719000  | -0.68336700 | 0.44462800  |
| O | -2.61617100 | -0.00769300 | 2.02020100  |
| C | 5.22500100  | -0.75333300 | 0.92179800  |
| H | 5.93456600  | -0.35840000 | 0.18539000  |
| H | 5.33425600  | -0.21220700 | 1.86867700  |
| H | 5.41809300  | -1.81357700 | 1.08399200  |
| C | -3.45310000 | -0.24751600 | 3.13527900  |
| H | -2.78671000 | -0.49120300 | 3.96207200  |
| H | -4.03964600 | 0.64366300  | 3.38707100  |
| H | -4.12738100 | -1.09129000 | 2.94671400  |

Zero-point correction= 0.306809 (Hartree/Particle)  
Thermal correction to Energy= 0.326536

|                                              |              |
|----------------------------------------------|--------------|
| Thermal correction to Enthalpy=              | 0.327480     |
| Thermal correction to Gibbs Free Energy=     | 0.255686     |
| Sum of electronic and zero-point Energies=   | -1390.048083 |
| Sum of electronic and thermal Energies=      | -1390.028355 |
| Sum of electronic and thermal Enthalpies=    | -1390.027411 |
| Sum of electronic and thermal Free Energies= | -1390.099206 |

M062X/6-311G(d,p) optimized with IEFPCM (toluene;  $\epsilon=2.37$ )

|   |             |             |             |
|---|-------------|-------------|-------------|
| N | -0.92364000 | 0.69551000  | 0.11397800  |
| C | -2.32137600 | 0.78893000  | -0.05180100 |
| C | -2.87466800 | 1.58690600  | -1.04403900 |
| C | -4.25671700 | 1.71416800  | -1.16842700 |
| C | -5.08537900 | 1.04011900  | -0.28628600 |
| C | -4.54669500 | 0.23410600  | 0.71705100  |
| C | -3.16714600 | 0.10066400  | 0.84037200  |
| H | -2.20431800 | 2.11003900  | -1.71668000 |
| H | -4.67381200 | 2.33952800  | -1.94751000 |
| H | -6.16159800 | 1.13271200  | -0.36808100 |
| H | -5.20962600 | -0.28738300 | 1.39399600  |
| C | 2.00483900  | 0.59986900  | -0.09011300 |
| C | 3.36213300  | 0.40779500  | 0.26669300  |
| C | 4.17310600  | 1.51460000  | 0.52672100  |
| C | 3.70058700  | 2.81134600  | 0.39158800  |
| C | 2.39956700  | 3.00968900  | -0.03316300 |
| C | 1.57672500  | 1.91739700  | -0.27367600 |
| H | 5.19960200  | 1.35355000  | 0.82287500  |
| H | 4.35525800  | 3.64783700  | 0.60252700  |
| H | 2.00509400  | 4.00746100  | -0.17663300 |
| H | 0.56487700  | 2.10441800  | -0.58603400 |
| C | 1.32678600  | -1.87364900 | -0.56366600 |
| S | -1.13273300 | -1.47396400 | -1.47055500 |
| C | -0.31012100 | -0.23978800 | -0.46470500 |
| N | 1.07683300  | -0.47363200 | -0.37676700 |
| O | 2.07961800  | -2.56614300 | 0.04373700  |
| C | 0.40073100  | -2.41543400 | -1.63347600 |
| H | 0.23239600  | -3.47364300 | -1.45568100 |
| H | 0.85071400  | -2.25848600 | -2.61474300 |
| O | 3.84660500  | -0.84667900 | 0.30322700  |
| O | -2.54239800 | -0.66706000 | 1.76487400  |
| C | 5.16537800  | -1.06946000 | 0.75722900  |

|   |             |             |            |
|---|-------------|-------------|------------|
| H | 5.90095200  | -0.61944300 | 0.08332300 |
| H | 5.30751800  | -0.67990500 | 1.76949000 |
| H | 5.29009400  | -2.14955500 | 0.76261400 |
| C | -3.35413500 | -1.41373700 | 2.65074900 |
| H | -2.67009800 | -1.96830300 | 3.28822000 |
| H | -3.97545600 | -0.75685600 | 3.26676600 |
| H | -3.99251100 | -2.11376000 | 2.10294300 |

|                                              |                             |
|----------------------------------------------|-----------------------------|
| Zero-point correction=                       | 0.305223 (Hartree/Particle) |
| Thermal correction to Energy=                | 0.324921                    |
| Thermal correction to Enthalpy=              | 0.325866                    |
| Thermal correction to Gibbs Free Energy=     | 0.254736                    |
| Sum of electronic and zero-point Energies=   | -1390.306449                |
| Sum of electronic and thermal Energies=      | -1390.286751                |
| Sum of electronic and thermal Enthalpies=    | -1390.285807                |
| Sum of electronic and thermal Free Energies= | -1390.356936                |

### **TS-rot-1b-N**

B3LYP/6-31+G\*

|   |             |             |             |
|---|-------------|-------------|-------------|
| N | 0.74165300  | -0.11835500 | 0.09341800  |
| C | 2.06326700  | -0.24090900 | -0.34211900 |
| C | 2.39528800  | -0.33530000 | -1.69945400 |
| C | 3.71577500  | -0.55279000 | -2.10704200 |
| C | 4.71822800  | -0.67855900 | -1.14852400 |
| C | 4.40737200  | -0.59338500 | 0.21580800  |
| C | 3.08897700  | -0.38218500 | 0.62746000  |
| H | 1.59751200  | -0.26685200 | -2.43439700 |
| H | 3.94984500  | -0.62672700 | -3.16537200 |
| H | 5.74903800  | -0.84677200 | -1.44887300 |
| H | 5.20061600  | -0.69115900 | 0.94860100  |
| C | -2.44555900 | -0.05574600 | 0.04846600  |
| C | -2.25678200 | -1.46299800 | -0.07233800 |
| C | -3.37585700 | -2.31260600 | -0.09083200 |
| C | -4.67673900 | -1.82126500 | -0.04289400 |
| C | -4.87366900 | -0.44581600 | 0.00686600  |
| C | -3.77404900 | 0.40867200  | 0.04721600  |
| H | -3.21831800 | -3.38176100 | -0.16441100 |
| H | -5.51675700 | -2.51041000 | -0.06036600 |
| H | -5.87344100 | -0.02190900 | 0.02175300  |

|   |             |             |             |
|---|-------------|-------------|-------------|
| H | -3.96532300 | 1.46821800  | 0.10693300  |
| C | -1.67624400 | 2.27845800  | 0.47452600  |
| S | 0.55322500  | 2.35375800  | -1.07636000 |
| C | -0.00845300 | 0.83017500  | -0.25735100 |
| N | -1.39254400 | 0.95118800  | 0.10263000  |
| O | -2.59417100 | 2.65206300  | 1.18018600  |
| C | -0.69734600 | 3.27846800  | -0.12592000 |
| H | -0.23594800 | 3.86189100  | 0.67606300  |
| H | -1.26439700 | 3.95806000  | -0.76802100 |
| O | -1.00368400 | -1.95807500 | -0.21464700 |
| O | 2.68992100  | -0.27499500 | 1.92710400  |
| C | -0.77735200 | -3.35855200 | -0.18047400 |
| H | -1.16005500 | -3.80349700 | 0.74715400  |
| H | -1.22790500 | -3.86283200 | -1.04587100 |
| H | 0.30739900  | -3.47287900 | -0.21848200 |
| C | 3.66257500  | -0.42990600 | 2.95083500  |
| H | 3.11854200  | -0.32880300 | 3.89155400  |
| H | 4.13618200  | -1.41977100 | 2.90682200  |
| H | 4.43452900  | 0.34874800  | 2.88982300  |

|                                              |                             |
|----------------------------------------------|-----------------------------|
| Zero-point correction=                       | 0.302730 (Hartree/Particle) |
| Thermal correction to Energy=                | 0.322716                    |
| Thermal correction to Enthalpy=              | 0.323661                    |
| Thermal correction to Gibbs Free Energy=     | 0.252602                    |
| Sum of electronic and zero-point Energies=   | -1390.486146                |
| Sum of electronic and thermal Energies=      | -1390.466159                |
| Sum of electronic and thermal Enthalpies=    | -1390.465215                |
| Sum of electronic and thermal Free Energies= | -1390.536274                |

**B3LYP/6-31+G\* optimized with IEFPCM (toluene;  $\epsilon=2.37$ )**

|   |            |             |             |
|---|------------|-------------|-------------|
| N | 0.70674900 | -0.14729100 | 0.01564200  |
| C | 2.03668900 | -0.21140400 | -0.41793500 |
| C | 2.37920000 | -0.16502800 | -1.77498100 |
| C | 3.70678900 | -0.31870300 | -2.18874900 |
| C | 4.70364300 | -0.52219700 | -1.23684800 |
| C | 4.38117800 | -0.57943900 | 0.12621800  |
| C | 3.05519400 | -0.43355300 | 0.54341200  |
| H | 1.58624100 | -0.03949900 | -2.50732200 |
| H | 3.95059300 | -0.28495500 | -3.24684600 |
| H | 5.73963700 | -0.64200800 | -1.54237900 |

|   |             |             |             |
|---|-------------|-------------|-------------|
| H | 5.17025400  | -0.73653100 | 0.85290100  |
| C | -2.44156200 | -0.11785000 | -0.01206000 |
| C | -2.22473500 | -1.49253900 | -0.29048300 |
| C | -3.32282100 | -2.35717400 | -0.43167500 |
| C | -4.63592400 | -1.91920300 | -0.33051500 |
| C | -4.86057500 | -0.56093900 | -0.10591500 |
| C | -3.78767300 | 0.31136600  | 0.03964100  |
| H | -3.10115800 | -3.39580200 | -0.66059000 |
| H | -5.46148300 | -2.61511400 | -0.45097000 |
| H | -5.87055900 | -0.16475200 | -0.04921500 |
| H | -4.00847600 | 1.35257700  | 0.21239800  |
| C | -1.72785600 | 2.18998400  | 0.62821100  |
| S | 0.51964000  | 2.44029600  | -0.87284700 |
| C | -0.03756500 | 0.83942400  | -0.22911700 |
| N | -1.42117500 | 0.90935500  | 0.13546600  |
| O | -2.65133300 | 2.47467500  | 1.37002700  |
| C | -0.77046900 | 3.25796300  | 0.12319800  |
| H | -0.33562000 | 3.79081100  | 0.97312200  |
| H | -1.34399900 | 3.96826300  | -0.47857600 |
| O | -0.99417000 | -2.04394500 | -0.54477900 |
| O | 2.64414800  | -0.46593500 | 1.84441100  |
| C | -0.45069200 | -2.86138200 | 0.49942400  |
| H | -0.23861500 | -2.25789200 | 1.38792100  |
| H | -1.13701100 | -3.67979600 | 0.75143800  |
| H | 0.48210000  | -3.27152100 | 0.10854200  |
| C | 3.61703200  | -0.70026400 | 2.85853200  |
| H | 3.06580400  | -0.70245700 | 3.80008700  |
| H | 4.11044500  | -1.67059700 | 2.72030600  |
| H | 4.37030600  | 0.09734600  | 2.87756500  |

|                                              |                             |
|----------------------------------------------|-----------------------------|
| Zero-point correction=                       | 0.302496 (Hartree/Particle) |
| Thermal correction to Energy=                | 0.322473                    |
| Thermal correction to Enthalpy=              | 0.323418                    |
| Thermal correction to Gibbs Free Energy=     | 0.252783                    |
| Sum of electronic and zero-point Energies=   | -1390.492909                |
| Sum of electronic and thermal Energies=      | -1390.472931                |
| Sum of electronic and thermal Enthalpies=    | -1390.471987                |
| Sum of electronic and thermal Free Energies= | -1390.542622                |

M06-2X/6-31+G(d)// B3LYP/6-31+G(d) (IEFPCM)



HF=-1390.3543793

M062X/6-31+G(d) optimized with IEFPCM (toluene;  $\epsilon=2.37$ )

|   |             |             |             |
|---|-------------|-------------|-------------|
| N | 0.73144500  | -0.18903300 | 0.16222300  |
| C | 2.04153400  | -0.34468700 | -0.30797500 |
| C | 2.31416700  | -0.58250600 | -1.65363000 |
| C | 3.62133100  | -0.81272900 | -2.08822100 |
| C | 4.65878800  | -0.80491500 | -1.16506500 |
| C | 4.40270900  | -0.57081200 | 0.19037000  |
| C | 3.09888700  | -0.34549000 | 0.62688900  |
| H | 1.48188900  | -0.61216300 | -2.35306500 |
| H | 3.81766700  | -1.00122300 | -3.13890200 |
| H | 5.68054500  | -0.98287900 | -1.48688100 |
| H | 5.22643800  | -0.56465600 | 0.89506800  |
| C | -2.45614100 | -0.00498000 | 0.07105600  |
| C | -2.32013400 | -1.41554100 | 0.02695700  |
| C | -3.46489600 | -2.22204300 | 0.03493000  |
| C | -4.74270100 | -1.67665400 | 0.03156600  |
| C | -4.88602400 | -0.29746200 | -0.00206400 |
| C | -3.75654400 | 0.51445800  | 0.01170600  |
| H | -3.34718700 | -3.29871300 | 0.02475700  |
| H | -5.60899900 | -2.33091600 | 0.03655000  |
| H | -5.86790800 | 0.16314700  | -0.03680100 |
| H | -3.90349900 | 1.58318700  | -0.00791500 |
| C | -1.58040300 | 2.29333800  | 0.38179100  |
| S | 0.60187900  | 2.16630100  | -1.20676000 |
| C | 0.00830500  | 0.74384900  | -0.26681800 |
| N | -1.36028300 | 0.94198000  | 0.09554700  |
| O | -2.47962000 | 2.74514900  | 1.05457200  |
| C | -0.54384900 | 3.20168100  | -0.25942900 |
| H | -0.02103000 | 3.75695300  | 0.52267800  |
| H | -1.07315500 | 3.90654400  | -0.90336400 |
| O | -1.08633700 | -1.94945400 | -0.06753700 |
| O | 2.74607600  | -0.09582400 | 1.91231800  |
| C | -0.92299000 | -3.35012200 | 0.01370100  |
| H | -1.33129500 | -3.74257000 | 0.95202700  |
| H | -1.39414900 | -3.85708000 | -0.83655800 |
| H | 0.15421600  | -3.51609900 | -0.01378500 |
| C | 3.77090100  | -0.10964800 | 2.88763400  |
| H | 3.27984700  | 0.08685000  | 3.84016500  |

|   |            |             |            |
|---|------------|-------------|------------|
| H | 4.26612700 | -1.08713900 | 2.92519000 |
| H | 4.51369300 | 0.67191900  | 2.68938800 |

|                                              |                             |
|----------------------------------------------|-----------------------------|
| Zero-point correction=                       | 0.306755 (Hartree/Particle) |
| Thermal correction to Energy=                | 0.326418                    |
| Thermal correction to Enthalpy=              | 0.327362                    |
| Thermal correction to Gibbs Free Energy=     | 0.256849                    |
| Sum of electronic and zero-point Energies=   | -1390.046929                |
| Sum of electronic and thermal Energies=      | -1390.027267                |
| Sum of electronic and thermal Enthalpies=    | -1390.026323                |
| Sum of electronic and thermal Free Energies= | -1390.096836                |

M062X/6-311G(d,p) optimized with IEFPCM (toluene;  $\epsilon=2.37$ )

|   |             |             |             |
|---|-------------|-------------|-------------|
| N | 0.71798400  | -0.23412700 | 0.14408300  |
| C | 2.03364400  | -0.40086900 | -0.30822200 |
| C | 2.31720000  | -0.69928100 | -1.63546600 |
| C | 3.62867600  | -0.92883800 | -2.04879400 |
| C | 4.65669000  | -0.85927000 | -1.12358200 |
| C | 4.38846600  | -0.56164300 | 0.21406500  |
| C | 3.08168300  | -0.33524700 | 0.63132700  |
| H | 1.49131800  | -0.77471700 | -2.33445900 |
| H | 3.83493600  | -1.16412900 | -3.08533600 |
| H | 5.68056500  | -1.03583900 | -1.42967700 |
| H | 5.20564200  | -0.50558100 | 0.92031900  |
| C | -2.45595700 | 0.01562200  | 0.05773900  |
| C | -2.34435000 | -1.39650900 | 0.04915900  |
| C | -3.50205900 | -2.17916100 | 0.08318700  |
| C | -4.76721200 | -1.61330800 | 0.06895600  |
| C | -4.88627000 | -0.23718500 | -0.00273800 |
| C | -3.74545400 | 0.55336100  | -0.01587600 |
| H | -3.40489600 | -3.25516400 | 0.10138300  |
| H | -5.64261100 | -2.25049400 | 0.09454600  |
| H | -5.85756800 | 0.23815400  | -0.04849500 |
| H | -3.87530600 | 1.62055900  | -0.06059700 |
| C | -1.54466400 | 2.30614900  | 0.32548300  |
| S | 0.66593200  | 2.11835100  | -1.21925100 |
| C | 0.02210400  | 0.71294200  | -0.28328100 |
| N | -1.34495800 | 0.94619000  | 0.05588400  |
| O | -2.44239000 | 2.78188800  | 0.96755300  |
| C | -0.47613800 | 3.18256500  | -0.30415100 |

|   |             |             |             |
|---|-------------|-------------|-------------|
| H | 0.04316600  | 3.72621700  | 0.48427300  |
| H | -0.97723100 | 3.89065800  | -0.96205400 |
| O | -1.12418000 | -1.95447200 | -0.03638500 |
| O | 2.71439300  | -0.02473400 | 1.89660500  |
| C | -0.98576100 | -3.35488600 | 0.08212200  |
| H | -1.39712700 | -3.71626500 | 1.02918500  |
| H | -1.46693200 | -3.87624600 | -0.75102100 |
| H | 0.08566300  | -3.54095200 | 0.05687400  |
| C | 3.72977000  | 0.00878600  | 2.88135600  |
| H | 3.22998600  | 0.24157000  | 3.81828800  |
| H | 4.23000400  | -0.96084900 | 2.96517900  |
| H | 4.46951200  | 0.78420100  | 2.65995300  |

|                                              |                             |
|----------------------------------------------|-----------------------------|
| Zero-point correction=                       | 0.305283 (Hartree/Particle) |
| Thermal correction to Energy=                | 0.324934                    |
| Thermal correction to Enthalpy=              | 0.325879                    |
| Thermal correction to Gibbs Free Energy=     | 0.255406                    |
| Sum of electronic and zero-point Energies=   | -1390.304443                |
| Sum of electronic and thermal Energies=      | -1390.284792                |
| Sum of electronic and thermal Enthalpies=    | -1390.283848                |
| Sum of electronic and thermal Free Energies= | -1390.354320                |

### **TS-rot-2b-S**

B3LYP/6-31+G\*

|   |             |            |             |
|---|-------------|------------|-------------|
| N | -1.10724200 | 0.33669000 | -0.00935300 |
| C | -2.49325200 | 0.35337700 | -0.22269900 |
| C | -3.05911500 | 0.46297700 | -1.49915600 |
| C | -4.44294300 | 0.57747500 | -1.67015300 |
| C | -5.27426000 | 0.58343500 | -0.55295100 |
| C | -4.73003900 | 0.48076100 | 0.73423400  |
| C | -3.34765900 | 0.37205000 | 0.90990300  |
| H | -2.40027100 | 0.48118800 | -2.36311900 |
| H | -4.85872300 | 0.66585800 | -2.66994500 |
| H | -6.35134400 | 0.67044300 | -0.66897200 |
| H | -5.39189600 | 0.48609600 | 1.59306100  |
| C | 1.77641400  | 0.75634000 | -0.34611900 |
| C | 3.10302800  | 0.97834700 | 0.11483800  |
| C | 3.65245200  | 2.26975000 | 0.06843100  |
| C | 2.95558500  | 3.34257200 | -0.47988700 |

|   |             |             |             |
|---|-------------|-------------|-------------|
| C | 1.68914200  | 3.12100100  | -1.01206300 |
| C | 1.12432800  | 1.85016800  | -0.94449900 |
| H | 4.65455700  | 2.42731700  | 0.44899400  |
| H | 3.41124300  | 4.32864400  | -0.50443700 |
| H | 1.12762200  | 3.92610300  | -1.47671300 |
| H | 0.13615400  | 1.71666000  | -1.35641400 |
| C | 1.53764600  | -1.84738000 | -0.22324700 |
| S | -0.85658200 | -1.99770100 | -1.43200800 |
| C | -0.34499500 | -0.53516300 | -0.51875500 |
| N | 1.07623300  | -0.51385700 | -0.33911700 |
| C | 0.82828500  | -2.70046400 | -1.25624800 |
| H | 0.77488600  | -3.74023100 | -0.93829900 |
| H | 1.35813800  | -2.63441700 | -2.21472300 |
| O | 3.82454300  | -0.08307300 | 0.54673000  |
| O | -2.72788600 | 0.26076100  | 2.11777700  |
| C | 5.10330300  | 0.10668900  | 1.13324800  |
| H | 5.82466300  | 0.49964200  | 0.40489100  |
| H | 5.04943300  | 0.77622500  | 2.00096900  |
| H | 5.41752500  | -0.88646400 | 1.45945600  |
| C | -3.52041600 | 0.30572400  | 3.29573500  |
| H | -2.81699800 | 0.22520500  | 4.12624500  |
| H | -4.06995000 | 1.25336100  | 3.37223300  |
| H | -4.22795500 | -0.53331900 | 3.33394600  |
| S | 2.51043800  | -2.54665000 | 0.89403200  |

|                                              |                             |
|----------------------------------------------|-----------------------------|
| Zero-point correction=                       | 0.300246 (Hartree/Particle) |
| Thermal correction to Energy=                | 0.320629                    |
| Thermal correction to Enthalpy=              | 0.321574                    |
| Thermal correction to Gibbs Free Energy=     | 0.249288                    |
| Sum of electronic and zero-point Energies=   | -1713.430262                |
| Sum of electronic and thermal Energies=      | -1713.409878                |
| Sum of electronic and thermal Enthalpies=    | -1713.408934                |
| Sum of electronic and thermal Free Energies= | -1713.481220                |

B3LYP/6-31+G\* optimized with IEFPCM (toluene;  $\epsilon=2.37$ )

|   |             |            |             |
|---|-------------|------------|-------------|
| N | -1.10629500 | 0.33994200 | 0.01729700  |
| C | -2.49162200 | 0.36698400 | -0.20958800 |
| C | -3.04216200 | 0.52260000 | -1.48837300 |
| C | -4.42415400 | 0.64266000 | -1.67152900 |
| C | -5.26859500 | 0.60818300 | -0.56394700 |

|   |             |             |             |
|---|-------------|-------------|-------------|
| C | -4.73962100 | 0.46031900  | 0.72532700  |
| C | -3.35888400 | 0.34592900  | 0.91337800  |
| H | -2.37351300 | 0.57437100  | -2.34334800 |
| H | -4.82812500 | 0.76735400  | -2.67227500 |
| H | -6.34432400 | 0.69885400  | -0.68910500 |
| H | -5.41152300 | 0.43523300  | 1.57573600  |
| C | 1.78358800  | 0.76126000  | -0.32024800 |
| C | 3.11332200  | 0.96728500  | 0.14031800  |
| C | 3.66752300  | 2.25788700  | 0.11698100  |
| C | 2.97375500  | 3.34329200  | -0.41050800 |
| C | 1.70527100  | 3.13721800  | -0.94585600 |
| C | 1.13502400  | 1.86764100  | -0.89980200 |
| H | 4.67037400  | 2.40500300  | 0.49936900  |
| H | 3.43360000  | 4.32761800  | -0.41738400 |
| H | 1.14753500  | 3.95268000  | -1.39671900 |
| H | 0.14733100  | 1.74513200  | -1.31659000 |
| C | 1.52646600  | -1.84201500 | -0.24750400 |
| S | -0.85327800 | -1.94047400 | -1.49230800 |
| C | -0.34470200 | -0.51476200 | -0.52404200 |
| N | 1.07561300  | -0.50525400 | -0.33473400 |
| C | 0.81862400  | -2.67083500 | -1.30042600 |
| H | 0.74244500  | -3.71422600 | -0.99999600 |
| H | 1.36315100  | -2.59929800 | -2.24981900 |
| O | 3.83159000  | -0.10490700 | 0.54845100  |
| O | -2.75457300 | 0.19282400  | 2.12477600  |
| C | 5.12723600  | 0.06870700  | 1.11078800  |
| H | 5.83075400  | 0.47637900  | 0.37426000  |
| H | 5.09399000  | 0.71779600  | 1.99409100  |
| H | 5.44587700  | -0.93228100 | 1.40621100  |
| C | -3.56465300 | 0.19841000  | 3.29636500  |
| H | -2.87209800 | 0.08886100  | 4.13218600  |
| H | -4.11316100 | 1.14355300  | 3.39597500  |
| H | -4.27181300 | -0.64071600 | 3.29477100  |
| S | 2.49325600  | -2.56684200 | 0.86236300  |

|                                            |                             |
|--------------------------------------------|-----------------------------|
| Zero-point correction=                     | 0.300212 (Hartree/Particle) |
| Thermal correction to Energy=              | 0.320583                    |
| Thermal correction to Enthalpy=            | 0.321528                    |
| Thermal correction to Gibbs Free Energy=   | 0.249404                    |
| Sum of electronic and zero-point Energies= | -1713.436268                |

Sum of electronic and thermal Energies= -1713.415897  
Sum of electronic and thermal Enthalpies= -1713.414953  
Sum of electronic and thermal Free Energies= -1713.487077

M06-2X/6-31+G(d)// B3LYP/6-31+G(d) (IEFPCM)

HF=-1713.2864719

M062X/6-31+G(d) optimized with IEFPCM (toluene;  $\epsilon=2.37$ )

|   |             |             |             |
|---|-------------|-------------|-------------|
| N | -1.02874200 | 0.74873100  | 0.27773500  |
| C | -2.42882100 | 0.85062900  | 0.12118800  |
| C | -2.99189100 | 1.86367500  | -0.64840800 |
| C | -4.37792100 | 1.99165500  | -0.75769100 |
| C | -5.20181500 | 1.09983600  | -0.08221700 |
| C | -4.65340900 | 0.07960800  | 0.70031600  |
| C | -3.26916800 | -0.05135000 | 0.80737800  |
| H | -2.32731000 | 2.55348400  | -1.16206900 |
| H | -4.80278100 | 2.78427300  | -1.36548200 |
| H | -6.28170000 | 1.18812800  | -0.15542200 |
| H | -5.31183100 | -0.60734700 | 1.21994200  |
| C | 1.88495000  | 0.81386000  | -0.06835700 |
| C | 3.23705700  | 0.67427300  | 0.32552900  |
| C | 4.00360100  | 1.80966500  | 0.60988200  |
| C | 3.48519400  | 3.09035900  | 0.46190800  |
| C | 2.18521800  | 3.24153500  | -0.00043400 |
| C | 1.41032300  | 2.11758800  | -0.26407600 |
| H | 5.02882000  | 1.68438600  | 0.93619300  |
| H | 4.10319100  | 3.95295200  | 0.69089800  |
| H | 1.75830100  | 4.22663100  | -0.15782800 |
| H | 0.40248500  | 2.26695300  | -0.62003300 |
| C | 1.25581800  | -1.62905000 | -0.72905800 |
| S | -1.15856700 | -1.12005800 | -1.68150600 |
| C | -0.40207100 | -0.05973000 | -0.46242800 |
| N | 0.99747300  | -0.28166100 | -0.37895100 |
| C | 0.42902700  | -1.96875700 | -1.94719500 |
| H | 0.27706600  | -3.04215600 | -2.03442900 |
| H | 0.91692600  | -1.57701500 | -2.84631000 |
| O | 3.76047100  | -0.56680600 | 0.37328700  |
| O | -2.63578400 | -1.00681900 | 1.53294900  |
| C | 5.08259700  | -0.75201800 | 0.83607100  |

|   |             |             |            |
|---|-------------|-------------|------------|
| H | 5.80672700  | -0.27080400 | 0.16855800 |
| H | 5.20242100  | -0.36742800 | 1.85504300 |
| H | 5.24123500  | -1.83085900 | 0.83254300 |
| C | -3.43581200 | -1.95731800 | 2.20961300 |
| H | -2.74018200 | -2.62830400 | 2.71263900 |
| H | -4.08036000 | -1.47345800 | 2.95280300 |
| H | -4.05036300 | -2.52741500 | 1.50289300 |
| S | 2.08366000  | -2.77364700 | 0.07254100 |

|                                              |                             |
|----------------------------------------------|-----------------------------|
| Zero-point correction=                       | 0.303952 (Hartree/Particle) |
| Thermal correction to Energy=                | 0.324140                    |
| Thermal correction to Enthalpy=              | 0.325084                    |
| Thermal correction to Gibbs Free Energy=     | 0.252340                    |
| Sum of electronic and zero-point Energies=   | -1712.983707                |
| Sum of electronic and thermal Energies=      | -1712.963519                |
| Sum of electronic and thermal Enthalpies=    | -1712.962575                |
| Sum of electronic and thermal Free Energies= | -1713.035319                |

M062X/6-311G(d,p) optimized with IEFPCM (toluene;  $\epsilon=2.37$ )

|   |             |             |             |
|---|-------------|-------------|-------------|
| N | 1.01758300  | 0.78414700  | -0.27736200 |
| C | 2.41962900  | 0.88823000  | -0.15012700 |
| C | 2.99770600  | 1.93702600  | 0.55164100  |
| C | 4.38299800  | 2.05728800  | 0.63961900  |
| C | 5.19010800  | 1.12267500  | 0.01128100  |
| C | 4.62654000  | 0.06641600  | -0.70458000 |
| C | 3.24334300  | -0.05845600 | -0.79189800 |
| H | 2.34531900  | 2.66033500  | 1.02726700  |
| H | 4.82049900  | 2.87825900  | 1.19346000  |
| H | 6.26866200  | 1.20527900  | 0.06892200  |
| H | 5.27310600  | -0.65267800 | -1.18889300 |
| C | -1.88868300 | 0.81534300  | 0.08320700  |
| C | -3.23575400 | 0.66281400  | -0.31575900 |
| C | -4.00997500 | 1.79139000  | -0.59327100 |
| C | -3.50574900 | 3.07292800  | -0.43344100 |
| C | -2.21281500 | 3.23421900  | 0.03467200  |
| C | -1.42936900 | 2.11912900  | 0.29339300  |
| H | -5.03010800 | 1.65971900  | -0.92434100 |
| H | -4.12964400 | 3.92899700  | -0.65839200 |
| H | -1.79913000 | 4.22051700  | 0.20136800  |
| H | -0.42652900 | 2.27366100  | 0.65318100  |

|   |             |             |             |
|---|-------------|-------------|-------------|
| C | -1.23181200 | -1.62374000 | 0.72692600  |
| S | 1.18348400  | -1.11041800 | 1.65208200  |
| C | 0.40880900  | -0.03970800 | 0.45204900  |
| N | -0.98896300 | -0.27144900 | 0.38608500  |
| C | -0.40095900 | -1.95686600 | 1.94091000  |
| H | -0.24516200 | -3.02626300 | 2.03138700  |
| H | -0.87702800 | -1.55335400 | 2.83747400  |
| O | -3.74386600 | -0.58092400 | -0.37405800 |
| O | 2.59413600  | -1.04405100 | -1.45554300 |
| C | -5.05545800 | -0.77860100 | -0.86116600 |
| H | -5.79696300 | -0.31520700 | -0.20357200 |
| H | -5.16451500 | -0.38661800 | -1.87622800 |
| H | -5.20032600 | -1.85686100 | -0.87135300 |
| C | 3.37740300  | -2.06562300 | -2.04163700 |
| H | 2.67296300  | -2.76289700 | -2.48833200 |
| H | 4.03528100  | -1.66410500 | -2.81820800 |
| H | 3.97550200  | -2.58351300 | -1.28550700 |
| S | -2.04474700 | -2.76965300 | -0.08166900 |

|                                              |                             |
|----------------------------------------------|-----------------------------|
| Zero-point correction=                       | 0.302405 (Hartree/Particle) |
| Thermal correction to Energy=                | 0.322534                    |
| Thermal correction to Enthalpy=              | 0.323478                    |
| Thermal correction to Gibbs Free Energy=     | 0.251568                    |
| Sum of electronic and zero-point Energies=   | -1713.250220                |
| Sum of electronic and thermal Energies=      | -1713.230091                |
| Sum of electronic and thermal Enthalpies=    | -1713.229147                |
| Sum of electronic and thermal Free Energies= | -1713.301057                |

### **TS-rot-2b-N**

B3LYP/6-31+G\*

|   |            |             |             |
|---|------------|-------------|-------------|
| N | 0.83451000 | -0.12788400 | 0.05911600  |
| C | 2.17651200 | -0.21718200 | -0.32484700 |
| C | 2.56199800 | -0.46250200 | -1.64832000 |
| C | 3.90860500 | -0.62930000 | -1.98750400 |
| C | 4.88150600 | -0.54939900 | -0.99401100 |
| C | 4.51682400 | -0.31224200 | 0.33836000  |
| C | 3.17189400 | -0.15405500 | 0.68340800  |
| H | 1.78830300 | -0.56085600 | -2.40490000 |
| H | 4.18619500 | -0.82554300 | -3.01921800 |



|   |             |             |             |
|---|-------------|-------------|-------------|
| H | 5.93214500  | -0.67452400 | -1.24213200 |
| H | 5.28803700  | -0.25140600 | 1.09816500  |
| C | -2.27819600 | -0.44257400 | -0.08688200 |
| C | -1.90010900 | -1.80928900 | -0.16983100 |
| C | -2.88904100 | -2.80621600 | -0.14522300 |
| C | -4.24317100 | -2.51125300 | -0.07454500 |
| C | -4.62682200 | -1.16991700 | -0.06488800 |
| C | -3.66279700 | -0.17023800 | -0.08318300 |
| H | -2.55303700 | -3.83579000 | -0.22812100 |
| H | -4.98142000 | -3.30834300 | -0.06334400 |
| H | -5.67626600 | -0.88943900 | -0.05347300 |
| H | -4.00001700 | 0.85397100  | -0.08729300 |
| C | -1.74139100 | 2.00835200  | 0.14058700  |
| S | 0.39076400  | 2.04794500  | -1.57356900 |
| C | 0.01795900  | 0.65705800  | -0.48996200 |
| N | -1.38053900 | 0.69492000  | -0.12605700 |
| C | -0.92387600 | 2.98330700  | -0.69576100 |
| H | -0.48564900 | 3.75557100  | -0.06062600 |
| H | -1.59104300 | 3.46335200  | -1.41755300 |
| O | -0.61563300 | -2.23090500 | -0.39982300 |
| O | 2.71885300  | 0.08634300  | 1.94675000  |
| C | 0.02197500  | -2.93131700 | 0.67524300  |
| H | 0.16214300  | -2.26658300 | 1.53408500  |
| H | -0.55868000 | -3.81420700 | 0.97021600  |
| H | 0.99539200  | -3.24481600 | 0.29379600  |
| C | 3.66412900  | 0.15094100  | 3.00623000  |
| H | 3.08059900  | 0.33200500  | 3.91047800  |
| H | 4.21521600  | -0.79327900 | 3.10872700  |
| H | 4.37331200  | 0.97586200  | 2.85779700  |
| S | -2.83543800 | 2.60619400  | 1.22502700  |

|                                              |                             |
|----------------------------------------------|-----------------------------|
| Zero-point correction=                       | 0.300037 (Hartree/Particle) |
| Thermal correction to Energy=                | 0.320456                    |
| Thermal correction to Enthalpy=              | 0.321400                    |
| Thermal correction to Gibbs Free Energy=     | 0.249437                    |
| Sum of electronic and zero-point Energies=   | -1713.431963                |
| Sum of electronic and thermal Energies=      | -1713.411544                |
| Sum of electronic and thermal Enthalpies=    | -1713.410600                |
| Sum of electronic and thermal Free Energies= | -1713.482563                |

B3LYP/6-31+G\* optimized with IEFPCM (toluene;  $\epsilon=2.37$ )

|   |             |             |             |
|---|-------------|-------------|-------------|
| N | 0.83458000  | -0.11626600 | 0.05517000  |
| C | 2.17904800  | -0.19878400 | -0.32373000 |
| C | 2.57311000  | -0.40879100 | -1.65123900 |
| C | 3.92192700  | -0.56817400 | -1.98596800 |
| C | 4.88831600  | -0.51585400 | -0.98347700 |
| C | 4.51530500  | -0.31399500 | 0.35253800  |
| C | 3.16784500  | -0.16359100 | 0.69311300  |
| H | 1.80586700  | -0.48656200 | -2.41675100 |
| H | 4.20603200  | -0.73763400 | -3.02062400 |
| H | 5.94046700  | -0.63574500 | -1.22760100 |
| H | 5.28153600  | -0.27470400 | 1.11859100  |
| C | -2.27855500 | -0.44187600 | -0.09325400 |
| C | -1.89657500 | -1.80654600 | -0.19209600 |
| C | -2.88178900 | -2.80727800 | -0.15913000 |
| C | -4.23615300 | -2.51600200 | -0.07215000 |
| C | -4.62489200 | -1.17569000 | -0.05647000 |
| C | -3.66387800 | -0.17286300 | -0.07930600 |
| H | -2.54665100 | -3.83635800 | -0.24919900 |
| H | -4.97146200 | -3.31556000 | -0.05539800 |
| H | -5.67517400 | -0.89917200 | -0.03707500 |
| H | -4.00428600 | 0.85037800  | -0.08160900 |
| C | -1.74233600 | 2.00592400  | 0.15608000  |
| S | 0.37714300  | 2.06618100  | -1.56910300 |
| C | 0.01617200  | 0.66705500  | -0.49406500 |
| N | -1.38364900 | 0.69814700  | -0.12664100 |
| C | -0.92840400 | 2.99260900  | -0.66762200 |
| H | -0.48086300 | 3.75261500  | -0.02448500 |
| H | -1.59753900 | 3.48580700  | -1.37836700 |
| O | -0.61306400 | -2.21453900 | -0.44896600 |
| O | 2.70834600  | 0.04416500  | 1.95937100  |
| C | 0.03683800  | -2.96448300 | 0.58701500  |
| H | 0.16304900  | -2.34648500 | 1.48180300  |
| H | -0.52676100 | -3.87271700 | 0.83106300  |
| H | 1.01580200  | -3.23807400 | 0.19020600  |
| C | 3.65005600  | 0.07380900  | 3.02865200  |
| H | 3.06148700  | 0.22988100  | 3.93382300  |
| H | 4.19560700  | -0.87521500 | 3.10427500  |
| H | 4.36127100  | 0.90031000  | 2.90720800  |
| S | -2.83485300 | 2.58858400  | 1.25584300  |

|                                              |                             |
|----------------------------------------------|-----------------------------|
| Zero-point correction=                       | 0.299932 (Hartree/Particle) |
| Thermal correction to Energy=                | 0.320363                    |
| Thermal correction to Enthalpy=              | 0.321307                    |
| Thermal correction to Gibbs Free Energy=     | 0.249607                    |
| Sum of electronic and zero-point Energies=   | -1713.437600                |
| Sum of electronic and thermal Energies=      | -1713.417169                |
| Sum of electronic and thermal Enthalpies=    | -1713.416225                |
| Sum of electronic and thermal Free Energies= | -1713.487925                |

M06-2X/6-31+G(d)// B3LYP/6-31+G(d) (IEFPCM)

HF=-1713.2892488

M062X/6-31+G(d) optimized with IEFPCM (toluene;  $\epsilon=2.37$ )

|   |             |             |             |
|---|-------------|-------------|-------------|
| N | 0.81527900  | -0.10195300 | 0.06921800  |
| C | 2.15382900  | -0.15490900 | -0.33277600 |
| C | 2.52494900  | -0.22801600 | -1.67449400 |
| C | 3.86767500  | -0.33935100 | -2.03918200 |
| C | 4.84167600  | -0.38016200 | -1.04976400 |
| C | 4.48725100  | -0.32434700 | 0.30219800  |
| C | 3.14678800  | -0.22328500 | 0.66950700  |
| H | 1.74391800  | -0.23571900 | -2.43139000 |
| H | 4.14102200  | -0.39981000 | -3.08767600 |
| H | 5.89080900  | -0.46374000 | -1.31721500 |
| H | 5.26337500  | -0.36207500 | 1.05807200  |
| C | -2.25728800 | -0.45344600 | -0.12142100 |
| C | -1.84294000 | -1.79786900 | -0.26866200 |
| C | -2.79981900 | -2.81953400 | -0.28649800 |
| C | -4.15889600 | -2.56513200 | -0.21054400 |
| C | -4.57804600 | -1.23877200 | -0.15640500 |
| C | -3.64368300 | -0.21549700 | -0.12663600 |
| H | -2.42828900 | -3.83330500 | -0.40598400 |
| H | -4.87454700 | -3.38100300 | -0.23342900 |
| H | -5.63392600 | -0.98753500 | -0.15004900 |
| H | -4.00681200 | 0.80005500  | -0.11322900 |
| C | -1.76958400 | 1.97861600  | 0.24730200  |
| S | 0.36181300  | 2.14832900  | -1.43889300 |
| C | 0.00401000  | 0.70197400  | -0.44896000 |
| N | -1.39178800 | 0.70113700  | -0.09626700 |

|   |             |             |             |
|---|-------------|-------------|-------------|
| C | -0.91728200 | 3.01319000  | -0.47144500 |
| H | -0.45937100 | 3.68725300  | 0.25428700  |
| H | -1.56676600 | 3.59330900  | -1.13055200 |
| O | -0.55256200 | -2.17910600 | -0.50638300 |
| O | 2.70034900  | -0.16201100 | 1.94760800  |
| C | 0.09641900  | -2.81158800 | 0.59460600  |
| H | 0.10040300  | -2.15163400 | 1.46674700  |
| H | -0.39542300 | -3.76112500 | 0.83606000  |
| H | 1.12377700  | -2.99805200 | 0.27758700  |
| C | 3.66396100  | -0.21518000 | 2.98326200  |
| H | 3.10287700  | -0.16210700 | 3.91557500  |
| H | 4.22986600  | -1.15339400 | 2.94800800  |
| H | 4.35394400  | 0.63423300  | 2.92100200  |
| S | -2.90217100 | 2.48599200  | 1.32584300  |

|                                              |                             |
|----------------------------------------------|-----------------------------|
| Zero-point correction=                       | 0.303961 (Hartree/Particle) |
| Thermal correction to Energy=                | 0.324022                    |
| Thermal correction to Enthalpy=              | 0.324966                    |
| Thermal correction to Gibbs Free Energy=     | 0.254113                    |
| Sum of electronic and zero-point Energies=   | -1712.987187                |
| Sum of electronic and thermal Energies=      | -1712.967127                |
| Sum of electronic and thermal Enthalpies=    | -1712.966182                |
| Sum of electronic and thermal Free Energies= | -1713.037036                |

#### M062X/6-311G(d,p) optimized with IEFPCM (toluene; $\epsilon=2.37$ )

|   |             |             |             |
|---|-------------|-------------|-------------|
| N | 0.81116400  | -0.07558600 | 0.04198700  |
| C | 2.15279900  | -0.11062800 | -0.34479800 |
| C | 2.54296200  | -0.11372300 | -1.67970200 |
| C | 3.88824100  | -0.21184600 | -2.02712300 |
| C | 4.84318100  | -0.31228000 | -1.02854600 |
| C | 4.46890600  | -0.32875000 | 0.31608100  |
| C | 3.12625000  | -0.24060400 | 0.66790100  |
| H | 1.77569700  | -0.07836700 | -2.44550400 |
| H | 4.17835300  | -0.21807100 | -3.07007500 |
| H | 5.89320500  | -0.38765600 | -1.28354500 |
| H | 5.23120900  | -0.41476200 | 1.07827500  |
| C | -2.24037000 | -0.46472800 | -0.14650500 |
| C | -1.80212300 | -1.79673400 | -0.31984900 |
| C | -2.74252700 | -2.82988700 | -0.35049500 |
| C | -4.10205700 | -2.60003200 | -0.27125400 |

|   |             |             |             |
|---|-------------|-------------|-------------|
| C | -4.54320200 | -1.28526900 | -0.19768700 |
| C | -3.62806900 | -0.24997600 | -0.15260300 |
| H | -2.35467400 | -3.83246900 | -0.48826600 |
| H | -4.80188700 | -3.42545100 | -0.30573800 |
| H | -5.60073800 | -1.05326000 | -0.18988000 |
| H | -4.00598800 | 0.75701900  | -0.12550200 |
| C | -1.79320700 | 1.96212000  | 0.29283700  |
| S | 0.33823000  | 2.22356500  | -1.37982500 |
| C | -0.00205400 | 0.73681200  | -0.44500100 |
| N | -1.39866100 | 0.70646800  | -0.09859200 |
| C | -0.94593500 | 3.03360800  | -0.37342400 |
| H | -0.48872900 | 3.66577100  | 0.38519100  |
| H | -1.59529300 | 3.63982200  | -1.00350800 |
| O | -0.51014600 | -2.15914300 | -0.56444500 |
| O | 2.65652200  | -0.25171500 | 1.93581200  |
| C | 0.14997200  | -2.79406800 | 0.52932200  |
| H | 0.19469600  | -2.12378300 | 1.38938500  |
| H | -0.35779400 | -3.72579100 | 0.79491300  |
| H | 1.16194100  | -3.01044800 | 0.19011000  |
| C | 3.60057100  | -0.37557900 | 2.98376300  |
| H | 3.02490500  | -0.37051900 | 3.90574000  |
| H | 4.15731700  | -1.31416600 | 2.90506900  |
| H | 4.29891200  | 0.46641500  | 2.98407900  |
| S | -2.93883500 | 2.41304800  | 1.37901700  |

|                                              |                             |
|----------------------------------------------|-----------------------------|
| Zero-point correction=                       | 0.302557 (Hartree/Particle) |
| Thermal correction to Energy=                | 0.322555                    |
| Thermal correction to Enthalpy=              | 0.323499                    |
| Thermal correction to Gibbs Free Energy=     | 0.252433                    |
| Sum of electronic and zero-point Energies=   | -1713.253812                |
| Sum of electronic and thermal Energies=      | -1713.233814                |
| Sum of electronic and thermal Enthalpies=    | -1713.232869                |
| Sum of electronic and thermal Free Energies= | -1713.303935                |

### **TS(M,S,R,R)-x**

B3LYP/6-31+G\* optimized with IEFPCM (dichloromethane;  $\epsilon=8.93$ )

|   |             |             |            |
|---|-------------|-------------|------------|
| N | -2.91244100 | 0.06145400  | 0.28886400 |
| C | -3.55682300 | -1.08077100 | 0.80633100 |
| C | -3.75470200 | -1.21732700 | 2.18561800 |

|   |             |             |             |
|---|-------------|-------------|-------------|
| C | -4.46449200 | -2.30099200 | 2.71477900  |
| C | -4.99878800 | -3.25855500 | 1.85297300  |
| C | -4.82553200 | -3.13694100 | 0.46789300  |
| C | -4.11075700 | -2.05634100 | -0.06202400 |
| H | -3.34292000 | -0.45323700 | 2.83979800  |
| H | -4.59890800 | -2.38790100 | 3.78956500  |
| H | -5.55661600 | -4.10445400 | 2.24611000  |
| H | -5.25084000 | -3.88751800 | -0.18901300 |
| O | -3.89834600 | -1.85471300 | -1.39758800 |
| C | -4.42449100 | -2.80644600 | -2.32111500 |
| H | -4.13554200 | -2.44803900 | -3.31015900 |
| H | -5.51810800 | -2.85996100 | -2.25589100 |
| H | -3.99540000 | -3.80162300 | -2.15190600 |
| C | -1.63652900 | 2.35880500  | -0.76736500 |
| C | -1.68451700 | 3.28138800  | 0.29695600  |
| C | -2.32555800 | 4.51205500  | 0.10006500  |
| C | -2.90599900 | 4.80707500  | -1.13838100 |
| C | -2.85927600 | 3.89011300  | -2.18973500 |
| C | -2.22160000 | 2.66169200  | -1.99376900 |
| H | -2.37572600 | 5.24149300  | 0.90023100  |
| H | -3.39868100 | 5.76642100  | -1.27335700 |
| H | -3.31308700 | 4.12286300  | -3.14837500 |
| H | -2.17145400 | 1.92611400  | -2.79160500 |
| O | -1.08758000 | 2.89711800  | 1.45679000  |
| C | -1.12130700 | 3.79038100  | 2.57246800  |
| H | -0.59639100 | 3.27389000  | 3.37682800  |
| H | -2.15302400 | 3.99690900  | 2.87977900  |
| H | -0.60603700 | 4.72970500  | 2.34051600  |
| C | 3.21292100  | 0.23224800  | 0.77286600  |
| C | 4.69727900  | 0.01919400  | 0.47104200  |
| C | 2.99814400  | 1.61660700  | 0.63951300  |
| C | 4.32047200  | 2.23917700  | 0.23658100  |
| C | 5.47788900  | 0.63222500  | 1.67881100  |
| C | 4.94099000  | 1.10224100  | -0.60438700 |
| C | 5.21181400  | 2.16410200  | 1.52519400  |
| C | 2.09224000  | -0.88827500 | -0.75467200 |
| C | 0.76084500  | -0.45799900 | -0.61925100 |
| C | 0.35921500  | 0.86466500  | -0.89422500 |
| S | 1.45072700  | 2.07670500  | -1.33689600 |
| S | -0.57271400 | -1.38586700 | 0.10678200  |

|   |             |             |             |
|---|-------------|-------------|-------------|
| C | -1.67927000 | 0.01634000  | -0.04136900 |
| N | -0.98557900 | 1.09542700  | -0.57704200 |
| H | 2.63359600  | -0.32896100 | -1.51096900 |
| C | 2.55340600  | -2.28136700 | -0.57664000 |
| H | 2.26433200  | 2.16132400  | 1.22323000  |
| H | 2.71353700  | -0.33718500 | 1.55196700  |
| H | 4.98671900  | -1.00493300 | 0.22415900  |
| H | 4.26670100  | 3.23225400  | -0.21571800 |
| H | 5.13023200  | 0.23231600  | 2.63734000  |
| H | 6.54705200  | 0.40415300  | 1.59242400  |
| H | 6.00452900  | 1.26109700  | -0.81596800 |
| H | 4.41148600  | 0.92647500  | -1.54535200 |
| H | 4.71354600  | 2.60231300  | 2.39650600  |
| H | 6.14341600  | 2.71891700  | 1.36270600  |
| C | 3.44279700  | -2.81881000 | -1.52787400 |
| C | 3.90529000  | -4.13158100 | -1.42071800 |
| C | 3.50215100  | -4.93194300 | -0.34708100 |
| C | 2.63715100  | -4.40523900 | 0.61824300  |
| C | 2.16798400  | -3.09509200 | 0.50637000  |
| H | 3.76385400  | -2.20223400 | -2.36404300 |
| H | 4.58227600  | -4.52693000 | -2.17356800 |
| H | 3.86328900  | -5.95313800 | -0.25910100 |
| H | 2.32910200  | -5.01393600 | 1.46437200  |
| H | 1.51873300  | -2.70078000 | 1.28239400  |

Zero-point correction= 0.540897 (Hartree/Particle)  
 Thermal correction to Energy= 0.573587  
 Thermal correction to Enthalpy= 0.574531  
 Thermal correction to Gibbs Free Energy= 0.472963  
 Sum of electronic and zero-point Energies= -2255.114164  
 Sum of electronic and thermal Energies= -2255.081474  
 Sum of electronic and thermal Enthalpies= -2255.080530  
 Sum of electronic and thermal Free Energies= -2255.182098

M06-2X/6-31+G(d)// B3LYP/6-31+G(d) (IEFPCM)

HF= -2254.9665803

### **TS(P,S,R,R)-x**

B3LYP/6-31+G\* optimized with IEFPCM (dichloromethane;  $\epsilon=8.93$ )

|   |             |             |             |
|---|-------------|-------------|-------------|
| N | 2.83905000  | 0.28826400  | 0.10429900  |
| C | 3.42270600  | 1.56871900  | 0.10990100  |
| C | 3.59857500  | 2.30057300  | -1.07240600 |
| C | 4.26651400  | 3.53018300  | -1.07392300 |
| C | 4.77544800  | 4.03711600  | 0.12124200  |
| C | 4.61954600  | 3.32025000  | 1.31522400  |
| C | 3.95074100  | 2.09090000  | 1.31842100  |
| H | 3.21603000  | 1.88272700  | -1.99994000 |
| H | 4.39061300  | 4.07749100  | -2.00444100 |
| H | 5.29985700  | 4.98894100  | 0.13759500  |
| H | 5.02165100  | 3.72812500  | 2.23584200  |
| O | 3.74877000  | 1.32867200  | 2.43493900  |
| C | 4.28346900  | 1.78600000  | 3.67600600  |
| H | 4.02203000  | 1.02120100  | 4.40882000  |
| H | 3.83781000  | 2.74375000  | 3.97165700  |
| H | 5.37446300  | 1.88693800  | 3.62528400  |
| C | 1.75484100  | -2.31319400 | -0.13202800 |
| C | 2.27113400  | -2.86591400 | -1.32181300 |
| C | 3.03639900  | -4.03789000 | -1.25074000 |
| C | 3.28129000  | -4.63690500 | -0.01035200 |
| C | 2.77332900  | -4.08425400 | 1.16665900  |
| C | 2.00809200  | -2.91686400 | 1.09614000  |
| H | 3.44385900  | -4.48509600 | -2.15006600 |
| H | 3.87803300  | -5.54454900 | 0.02699500  |
| H | 2.96765900  | -4.55247700 | 2.12692300  |
| H | 1.60035600  | -2.46264600 | 1.99451100  |
| O | 1.97623300  | -2.20205900 | -2.47141300 |
| C | 2.46324200  | -2.72576700 | -3.70961300 |
| H | 2.10142800  | -2.04226900 | -4.47840500 |
| H | 2.06630500  | -3.73071400 | -3.89402400 |
| H | 3.55905400  | -2.74843800 | -3.72326700 |
| C | -3.20976300 | -0.18664700 | 1.13760100  |
| C | -4.72224100 | -0.18852300 | 0.90677100  |
| C | -2.87414800 | -1.52313200 | 1.42405500  |
| C | -4.15028700 | -2.33648000 | 1.33730200  |
| C | -5.37391100 | -0.44803500 | 2.30398600  |
| C | -4.91956100 | -1.56893300 | 0.23957400  |
| C | -4.97657600 | -1.92799200 | 2.60633200  |
| C | -2.28917700 | 0.46640900  | -0.74785800 |
| C | -0.91561600 | 0.20618100  | -0.59707500 |



|   |             |             |             |
|---|-------------|-------------|-------------|
| C | -0.39973600 | -1.09872900 | -0.47373000 |
| S | -1.38842100 | -2.46873300 | -0.42589600 |
| S | 0.35718000  | 1.42040600  | -0.32985700 |
| C | 1.59067400  | 0.13335300  | -0.11634600 |
| N | 0.97452400  | -1.11158500 | -0.19878900 |
| H | -2.81284700 | -0.34519000 | -1.24254300 |
| C | -2.87256000 | 1.80430400  | -0.98247600 |
| H | -2.06528700 | -1.80079000 | 2.09099100  |
| H | -2.72554200 | 0.63393600  | 1.65996600  |
| H | -5.12084700 | 0.68256600  | 0.38165800  |
| H | -4.02592300 | -3.41427900 | 1.20895600  |
| H | -5.01135300 | 0.25458500  | 3.06188300  |
| H | -6.46268000 | -0.33369100 | 2.23997600  |
| H | -5.97313900 | -1.86351900 | 0.17347500  |
| H | -4.46056300 | -1.65861600 | -0.74925900 |
| H | -4.39617800 | -2.03661600 | 3.52875200  |
| H | -5.86025500 | -2.57113400 | 2.69370000  |
| C | -3.85095600 | 1.94066800  | -1.98692100 |
| C | -4.43087400 | 3.17985200  | -2.26417900 |
| C | -4.05758200 | 4.30908900  | -1.52841100 |
| C | -3.10379000 | 4.18540500  | -0.51231900 |
| C | -2.51756900 | 2.94763600  | -0.24093900 |
| H | -4.14816900 | 1.06673400  | -2.56168000 |
| H | -5.17530300 | 3.26184300  | -3.05188700 |
| H | -4.50982100 | 5.27449200  | -1.73936300 |
| H | -2.81704100 | 5.05409300  | 0.07462500  |
| H | -1.79929800 | 2.87187600  | 0.57002000  |

|                                              |                             |
|----------------------------------------------|-----------------------------|
| Zero-point correction=                       | 0.541043 (Hartree/Particle) |
| Thermal correction to Energy=                | 0.573681                    |
| Thermal correction to Enthalpy=              | 0.574625                    |
| Thermal correction to Gibbs Free Energy=     | 0.472983                    |
| Sum of electronic and zero-point Energies=   | -2255.114030                |
| Sum of electronic and thermal Energies=      | -2255.081392                |
| Sum of electronic and thermal Enthalpies=    | -2255.080448                |
| Sum of electronic and thermal Free Energies= | -2255.182090                |

M06-2X/6-31+G(d)// B3LYP/6-31+G(d) (IEFPCM)

HF= -2254.9655992

**TS(M,S,S)-x**B3LYP/6-31+G\* optimized with IEFPCM (dichloromethane;  $\epsilon=8.93$ )

|   |             |             |             |
|---|-------------|-------------|-------------|
| C | 1.83847600  | -2.02904100 | -0.98950900 |
| C | 2.07284900  | -2.99869400 | 0.00578400  |
| C | 2.94198900  | -4.06208300 | -0.27498900 |
| C | 3.55859400  | -4.14993200 | -1.52759700 |
| C | 3.32443000  | -3.18784100 | -2.51149700 |
| C | 2.46250200  | -2.12415600 | -2.23097900 |
| H | 3.14152800  | -4.82166100 | 0.47207800  |
| H | 4.22850200  | -4.98221600 | -1.72713900 |
| H | 3.80710600  | -3.25825800 | -3.48161500 |
| H | 2.26558700  | -1.35633900 | -2.97388400 |
| O | 1.42133500  | -2.82486000 | 1.18572600  |
| C | 1.64298800  | -3.76897600 | 2.23573100  |
| H | 1.03409200  | -3.42423800 | 3.07212200  |
| H | 2.69825400  | -3.78707500 | 2.53176000  |
| H | 1.32218000  | -4.77373400 | 1.93679600  |
| C | -3.58305100 | -0.82163900 | 0.06071500  |
| C | -3.38566800 | -0.63945100 | 1.56431100  |
| C | -3.21210400 | -2.15536100 | -0.21346800 |
| C | -2.77168900 | -2.77065000 | 1.10284500  |
| C | -4.51607000 | -1.48041500 | 2.24424300  |
| C | -4.09899700 | -2.95073500 | 1.92007700  |
| C | -2.36052800 | 0.58198600  | -1.09953100 |
| C | -0.99681700 | 0.34726300  | -0.83949700 |
| C | -0.37073300 | -0.87588200 | -1.15049800 |
| S | -1.21845000 | -2.20127900 | -1.77308300 |
| S | 0.10968900  | 1.40914300  | 0.06360400  |
| C | 1.43325200  | 0.20744100  | -0.06880400 |
| N | 0.96010300  | -0.92810100 | -0.71727300 |
| H | -2.71113000 | 0.01338100  | -1.95669500 |
| C | -3.05549700 | 1.87331000  | -0.91128400 |
| H | -3.69737400 | -2.74990700 | -0.98047000 |
| H | -4.44670900 | -0.38508400 | -0.43390800 |
| H | -4.52348200 | -1.29865400 | 3.32567400  |
| H | -5.50818300 | -1.22338900 | 1.85801600  |
| H | -3.89280000 | -3.52003000 | 2.83434500  |
| H | -4.86112500 | -3.49801100 | 1.35496600  |
| C | -2.85774800 | 2.71971300  | 0.19687100  |

|   |             |             |             |
|---|-------------|-------------|-------------|
| C | -3.55317000 | 3.92587600  | 0.30870300  |
| C | -4.46434500 | 4.31238800  | -0.67917900 |
| C | -4.68255000 | 3.47598500  | -1.77923100 |
| C | -3.99147200 | 2.26889200  | -1.88827300 |
| H | -2.17450200 | 2.43458700  | 0.99023200  |
| H | -3.38406600 | 4.56202000  | 1.17362800  |
| H | -5.00220900 | 5.25250000  | -0.59035200 |
| H | -5.39104000 | 3.76267000  | -2.55205200 |
| H | -4.16782100 | 1.62432800  | -2.74648500 |
| C | -2.16320600 | -1.54679600 | 1.82274700  |
| H | -1.98743300 | -1.72974700 | 2.88918200  |
| H | -1.23816200 | -1.18832900 | 1.36906900  |
| H | -3.32821000 | 0.39376500  | 1.91491600  |
| H | -2.15976300 | -3.67191700 | 1.03267100  |
| N | 2.63240300  | 0.33408500  | 0.35206100  |
| C | 3.04849900  | 1.53109200  | 0.97016800  |
| C | 3.11400600  | 1.62375100  | 2.36555300  |
| C | 3.60098300  | 2.77458400  | 2.99554700  |
| C | 4.04376400  | 3.84647500  | 2.22095200  |
| C | 4.00151300  | 3.77197500  | 0.82238900  |
| C | 3.50987100  | 2.62346600  | 0.19134300  |
| H | 2.77741700  | 0.77256300  | 2.95171800  |
| H | 3.63552500  | 2.82493600  | 4.08047100  |
| H | 4.42874800  | 4.74640600  | 2.69337300  |
| H | 4.35377100  | 4.61215000  | 0.23436100  |
| O | 3.43782600  | 2.46032400  | -1.16418200 |
| C | 3.88804400  | 3.52319700  | -2.00276500 |
| H | 3.73900300  | 3.17443000  | -3.02567600 |
| H | 4.95196900  | 3.73411700  | -1.83921800 |
| H | 3.30098700  | 4.43487000  | -1.83735200 |

|                                              |                             |
|----------------------------------------------|-----------------------------|
| Zero-point correction=                       | 0.541368 (Hartree/Particle) |
| Thermal correction to Energy=                | 0.573893                    |
| Thermal correction to Enthalpy=              | 0.574837                    |
| Thermal correction to Gibbs Free Energy=     | 0.474713                    |
| Sum of electronic and zero-point Energies=   | -2255.110043                |
| Sum of electronic and thermal Energies=      | -2255.077519                |
| Sum of electronic and thermal Enthalpies=    | -2255.076574                |
| Sum of electronic and thermal Free Energies= | -2255.176699                |

M06-2X/6-31+G(d)// B3LYP/6-31+G(d) (IEFPCM)

HF= -2254.9643165

**TS(P,S,S,S)-x**

B3LYP/6-31+G\* optimized with IEFPCM (dichloromethane;  $\epsilon=8.93$ )

|   |             |             |             |
|---|-------------|-------------|-------------|
| C | 2.13907100  | -1.97582100 | -0.10773300 |
| C | 2.82883000  | -2.45408400 | -1.24070500 |
| C | 3.83514900  | -3.41410600 | -1.06824900 |
| C | 4.14824200  | -3.87435300 | 0.21530400  |
| C | 3.46981900  | -3.39221900 | 1.33597400  |
| C | 2.46202700  | -2.43900000 | 1.16429300  |
| H | 4.37879200  | -3.80153800 | -1.92219100 |
| H | 4.93348000  | -4.61683300 | 0.33110400  |
| H | 3.71763300  | -3.75161900 | 2.33021300  |
| H | 1.91601900  | -2.04546600 | 2.01663800  |
| O | 2.45265600  | -1.93300300 | -2.43896400 |
| C | 3.10563100  | -2.39637300 | -3.62373600 |
| H | 2.64016200  | -1.85165500 | -4.44575300 |
| H | 2.95183200  | -3.47290400 | -3.76129400 |
| H | 4.17835900  | -2.17301400 | -3.59454000 |
| C | -3.39311400 | -1.19226200 | 0.53449700  |
| C | -3.23803600 | -0.39908200 | 1.83029400  |
| C | -2.83932300 | -2.46369300 | 0.79570700  |
| C | -2.33778400 | -2.43949100 | 2.22916000  |
| C | -4.25253200 | -1.03323500 | 2.83785600  |
| C | -3.63951300 | -2.44479500 | 3.10581700  |
| C | -2.36658000 | -0.22983300 | -1.15217100 |
| C | -0.98775900 | -0.15152500 | -0.87824500 |
| C | -0.19522800 | -1.29820700 | -0.67639800 |
| S | -0.83411600 | -2.86395700 | -0.68427700 |
| S | -0.05522300 | 1.32601500  | -0.54013600 |
| C | 1.41876900  | 0.36531400  | -0.19945400 |
| N | 1.11149500  | -0.98946700 | -0.27540400 |
| H | -2.62149900 | -1.14287700 | -1.68339000 |
| C | -3.24149500 | 0.91784000  | -1.47314000 |
| H | -3.23027900 | -3.37240800 | 0.34992600  |
| H | -4.30380200 | -1.10568800 | -0.05212600 |
| H | -4.29401700 | -0.43683400 | 3.75722300  |
| H | -5.26658600 | -1.07856400 | 2.42656900  |

|   |             |             |             |
|---|-------------|-------------|-------------|
| H | -3.37073500 | -2.57139800 | 4.16135200  |
| H | -4.31459800 | -3.26428500 | 2.83678000  |
| C | -3.18156200 | 2.16101900  | -0.81370800 |
| C | -4.04647200 | 3.19967000  | -1.16556600 |
| C | -4.99286800 | 3.02073500  | -2.17940800 |
| C | -5.07439900 | 1.78737700  | -2.83475800 |
| C | -4.21371300 | 0.74830900  | -2.47964700 |
| H | -2.47332800 | 2.32099900  | -0.00722400 |
| H | -3.98176200 | 4.14977500  | -0.64166900 |
| H | -5.66269800 | 3.83177900  | -2.45237100 |
| H | -5.80801600 | 1.63387200  | -3.62191400 |
| H | -4.28506900 | -0.20761600 | -2.99352900 |
| C | -1.90777400 | -0.96298800 | 2.37653900  |
| H | -1.72220600 | -0.67967700 | 3.41888100  |
| H | -1.03518200 | -0.69652400 | 1.77729200  |
| H | -3.32200000 | 0.68637600  | 1.73745700  |
| H | -1.61193600 | -3.20877400 | 2.49949000  |
| N | 2.58687400  | 0.81217600  | 0.05929000  |
| C | 2.82582700  | 2.20007000  | 0.12508600  |
| C | 3.39960500  | 2.87111100  | -0.96156100 |
| C | 3.72302900  | 4.23048200  | -0.88832200 |
| C | 3.48232600  | 4.93113500  | 0.29325100  |
| C | 2.92120600  | 4.27848900  | 1.39882800  |
| C | 2.59305300  | 2.91980200  | 1.32502800  |
| H | 3.59260200  | 2.30492800  | -1.86903700 |
| H | 4.16214300  | 4.72991700  | -1.74768300 |
| H | 3.73103900  | 5.98641000  | 0.36923900  |
| H | 2.74464900  | 4.83613200  | 2.31181500  |
| O | 2.04921300  | 2.20217100  | 2.35478400  |
| C | 1.80303300  | 2.86872600  | 3.59185100  |
| H | 1.38356700  | 2.11193800  | 4.25630000  |
| H | 1.08221600  | 3.68597600  | 3.46569600  |
| H | 2.73231600  | 3.26029400  | 4.02347500  |

|                                            |                             |
|--------------------------------------------|-----------------------------|
| Zero-point correction=                     | 0.541289 (Hartree/Particle) |
| Thermal correction to Energy=              | 0.573827                    |
| Thermal correction to Enthalpy=            | 0.574771                    |
| Thermal correction to Gibbs Free Energy=   | 0.474148                    |
| Sum of electronic and zero-point Energies= | -2255.110551                |
| Sum of electronic and thermal Energies=    | -2255.078013                |

Sum of electronic and thermal Enthalpies= -2255.077069  
Sum of electronic and thermal Free Energies= -2255.177692

M06-2X/6-31+G(d)// B3LYP/6-31+G(d) (IEFPCM)

HF= -2254.9644569

**TS(M,S,R,R)-n**

B3LYP/6-31+G\* optimized with IEFPCM (dichloromethane;  $\epsilon=8.93$ )

|   |            |             |             |
|---|------------|-------------|-------------|
| C | 1.61756900 | -2.36911000 | -0.72962600 |
| C | 1.73289700 | -3.26057100 | 0.35599100  |
| C | 2.38255800 | -4.48696800 | 0.16103700  |
| C | 2.90446900 | -4.80874800 | -1.09664400 |
| C | 2.79037000 | -3.92289500 | -2.16928400 |
| C | 2.14466300 | -2.69833600 | -1.97534300 |
| H | 2.48446500 | -5.19256700 | 0.97744700  |
| H | 3.40485900 | -5.76434100 | -1.22983400 |
| H | 3.19913400 | -4.17626800 | -3.14284200 |
| H | 2.04348300 | -1.98635400 | -2.78955700 |
| O | 1.18804600 | -2.85265700 | 1.53345400  |
| C | 1.29546800 | -3.71165400 | 2.67124700  |
| H | 0.80492700 | -3.17954500 | 3.48705300  |
| H | 2.34528500 | -3.89284100 | 2.92911200  |
| H | 0.78470000 | -4.66527400 | 2.49424000  |
| N | 2.90881200 | -0.03291800 | 0.21517000  |
| C | 3.55688700 | 1.12531300  | 0.69167800  |
| C | 3.80454100 | 1.28546700  | 2.06033500  |
| C | 4.51894600 | 2.38634400  | 2.54604700  |
| C | 5.00724100 | 3.33752600  | 1.65055500  |
| C | 4.78350800 | 3.19250200  | 0.27502800  |
| C | 4.06388400 | 2.09474600  | -0.21132700 |
| H | 3.42896800 | 0.52590300  | 2.74107900  |
| H | 4.69283400 | 2.49133700  | 3.61353700  |
| H | 5.56801200 | 4.19647300  | 2.00975600  |
| H | 5.17343100 | 3.93826500  | -0.40863100 |
| O | 3.80315500 | 1.87042000  | -1.53453500 |
| C | 4.28368000 | 2.81284100  | -2.49192400 |
| H | 3.96335700 | 2.43464800  | -3.46378900 |
| H | 5.37820000 | 2.88012600  | -2.46767300 |
| H | 3.84888300 | 3.80568900  | -2.32349000 |

|   |             |             |             |
|---|-------------|-------------|-------------|
| C | -3.18097400 | -0.23806100 | 1.01583400  |
| C | -4.70951100 | -0.07845000 | 0.93910000  |
| C | -2.94672800 | -1.62252200 | 0.93892900  |
| C | -4.30221800 | -2.30444600 | 0.79999300  |
| C | -5.24548000 | -0.44814300 | -0.47510800 |
| C | -4.94715800 | -1.97630800 | -0.58025200 |
| C | -2.15320600 | 0.82842900  | -0.59311000 |
| C | -0.81052000 | 0.41596100  | -0.51804500 |
| C | -0.40279400 | -0.90472400 | -0.79315200 |
| S | -1.49355000 | -2.13899900 | -1.17479900 |
| S | 0.53905700  | 1.37437600  | 0.13360600  |
| C | 1.66003600  | -0.01179900 | -0.05209700 |
| N | 0.95868400  | -1.10966800 | -0.53954300 |
| H | -2.71953200 | 0.25013400  | -1.31614900 |
| C | -2.60065800 | 2.23169600  | -0.42887600 |
| H | -2.10077100 | -2.11599900 | 1.39976900  |
| H | -2.60598400 | 0.38258300  | 1.69470600  |
| H | -6.32256100 | -0.24978300 | -0.51688200 |
| H | -4.78570300 | 0.13168700  | -1.27821600 |
| H | -5.86918900 | -2.55641500 | -0.70017700 |
| H | -4.28365000 | -2.22267400 | -1.41174700 |
| C | -2.22049000 | 3.03883800  | 0.66030100  |
| C | -2.66490400 | 4.35856600  | 0.76213100  |
| C | -3.49838500 | 4.90152300  | -0.22145400 |
| C | -3.89054100 | 4.10974200  | -1.30536400 |
| C | -3.45189700 | 2.78793800  | -1.40279700 |
| H | -1.59246100 | 2.63281800  | 1.44809200  |
| H | -2.36206400 | 4.96159000  | 1.61418100  |
| H | -3.84189000 | 5.92941300  | -0.14118800 |
| H | -4.53916800 | 4.51923500  | -2.07542300 |
| H | -3.75961100 | 2.18265300  | -2.25184400 |
| C | -5.13435800 | -1.35803500 | 1.72079900  |
| H | -6.21473700 | -1.55872200 | 1.68889400  |
| H | -4.79588800 | -1.35948600 | 2.76256000  |
| H | -5.08033300 | 0.87627900  | 1.31948600  |
| H | -4.29856800 | -3.36857600 | 1.04826100  |

|                                 |                             |
|---------------------------------|-----------------------------|
| Zero-point correction=          | 0.540839 (Hartree/Particle) |
| Thermal correction to Energy=   | 0.573544                    |
| Thermal correction to Enthalpy= | 0.574488                    |

Thermal correction to Gibbs Free Energy= 0.472371  
 Sum of electronic and zero-point Energies= -2255.100302  
 Sum of electronic and thermal Energies= -2255.067596  
 Sum of electronic and thermal Enthalpies= -2255.066652  
 Sum of electronic and thermal Free Energies= -2255.168769

M06-2X/6-31+G(d)// B3LYP/6-31+G(d) (IEFPCM)

HF= -2254.9523948

**TS(P,S,R,R)-n**

B3LYP/6-31+G\* optimized with IEFPCM (dichloromethane;  $\epsilon=8.93$ )

|   |            |             |             |
|---|------------|-------------|-------------|
| C | 1.79754700 | -2.35564600 | 0.02598500  |
| C | 2.25094600 | -2.99589500 | -1.14550800 |
| C | 3.01124100 | -4.16739600 | -1.02909900 |
| C | 3.31532200 | -4.67863100 | 0.23723900  |
| C | 2.87080600 | -4.03872400 | 1.39560200  |
| C | 2.10923900 | -2.87244300 | 1.28008700  |
| H | 3.37014400 | -4.68096400 | -1.91353300 |
| H | 3.90796200 | -5.58682600 | 0.30969500  |
| H | 3.11090700 | -4.43915100 | 2.37595200  |
| H | 1.74981600 | -2.35147800 | 2.16280200  |
| O | 1.90502000 | -2.41056900 | -2.32306600 |
| C | 2.32523400 | -3.02424100 | -3.54433100 |
| H | 1.93249400 | -2.39015800 | -4.33981600 |
| H | 1.91006700 | -4.03420000 | -3.63981200 |
| H | 3.41873300 | -3.06208400 | -3.60993000 |
| N | 2.91322600 | 0.24597400  | 0.02933800  |
| C | 3.47830100 | 1.53775700  | 0.00737100  |
| C | 4.00387700 | 2.06460700  | -1.17847600 |
| C | 4.64646500 | 3.30752300  | -1.19931500 |
| C | 4.77734400 | 4.03300800  | -0.01547400 |
| C | 4.26823600 | 3.52204000  | 1.18579500  |
| C | 3.62130700 | 2.28094400  | 1.20675000  |
| H | 3.90467400 | 1.47803800  | -2.08813200 |
| H | 5.04197800 | 3.69722900  | -2.13335700 |
| H | 5.27712900 | 4.99812800  | -0.01250600 |
| H | 4.38052200 | 4.09717200  | 2.09816400  |
| O | 3.09627900 | 1.70504800  | 2.33091700  |
| C | 3.21821900 | 2.40050900  | 3.57068100  |



|   |             |             |             |
|---|-------------|-------------|-------------|
| H | 2.74318900  | 1.76046800  | 4.31563800  |
| H | 2.70191000  | 3.36769000  | 3.53535600  |
| H | 4.27087800  | 2.55409900  | 3.83781900  |
| C | -3.12651200 | -0.05989500 | 1.29303200  |
| C | -4.66460700 | -0.02628700 | 1.24109200  |
| C | -2.79683500 | -1.36766200 | 1.69228000  |
| C | -4.10310600 | -2.13327700 | 1.86143100  |
| C | -5.20841300 | -0.89614500 | 0.07015400  |
| C | -4.80200200 | -2.34472000 | 0.48453500  |
| C | -2.23688200 | 0.43006700  | -0.63756000 |
| C | -0.86257200 | 0.16005100  | -0.50604300 |
| C | -0.35624200 | -1.14195400 | -0.32473000 |
| S | -1.35435000 | -2.49971500 | -0.18748700 |
| S | 0.42453400  | 1.37439200  | -0.33009400 |
| C | 1.65254200  | 0.08909800  | -0.09964400 |
| N | 1.02419200  | -1.15302700 | -0.08644000 |
| H | -2.77637300 | -0.40255100 | -1.07721900 |
| C | -2.78634600 | 1.76958000  | -0.95568300 |
| H | -1.90747600 | -1.61977600 | 2.25537000  |
| H | -2.57983100 | 0.79124300  | 1.68504900  |
| H | -6.29778900 | -0.78891800 | 0.01563400  |
| H | -4.81300300 | -0.60508300 | -0.90502200 |
| H | -5.68179800 | -2.98489000 | 0.61554600  |
| H | -4.14143400 | -2.82391100 | -0.24109300 |
| C | -2.44635200 | 2.93031400  | -0.23555100 |
| C | -2.98405300 | 4.17103200  | -0.58363100 |
| C | -3.87323700 | 4.27936500  | -1.65803600 |
| C | -4.22613400 | 3.13375000  | -2.37828500 |
| C | -3.69397500 | 1.89220300  | -2.02513500 |
| H | -1.77498700 | 2.86679400  | 0.61597800  |
| H | -2.71032700 | 5.05340600  | -0.01103800 |
| H | -4.28971400 | 5.24613100  | -1.92808800 |
| H | -4.91678000 | 3.20485300  | -3.21453100 |
| H | -3.97112500 | 1.00874600  | -2.59501800 |
| C | -4.97757700 | -0.97554500 | 2.43655400  |
| H | -6.04127100 | -1.23733300 | 2.52834200  |
| H | -4.61409200 | -0.59434100 | 3.39700200  |
| H | -5.09270400 | 0.97791600  | 1.28409100  |
| H | -4.01764600 | -3.04186700 | 2.46233300  |

|                                              |                             |
|----------------------------------------------|-----------------------------|
| Zero-point correction=                       | 0.541026 (Hartree/Particle) |
| Thermal correction to Energy=                | 0.573657                    |
| Thermal correction to Enthalpy=              | 0.574601                    |
| Thermal correction to Gibbs Free Energy=     | 0.472791                    |
| Sum of electronic and zero-point Energies=   | -2255.099964                |
| Sum of electronic and thermal Energies=      | -2255.067333                |
| Sum of electronic and thermal Enthalpies=    | -2255.066389                |
| Sum of electronic and thermal Free Energies= | -2255.168200                |

M06-2X/6-31+G(d)// B3LYP/6-31+G(d) (IEFPCM)

HF= -2254.9515176

### **TS(M,S,S)-n**

B3LYP/6-31+G\* optimized with IEFPCM (dichloromethane;  $\epsilon=8.93$ )

|   |             |             |             |
|---|-------------|-------------|-------------|
| C | 1.93354800  | -1.91089900 | -0.96991200 |
| C | 2.34001700  | -2.83900600 | 0.00928600  |
| C | 3.29770900  | -3.80604600 | -0.32769400 |
| C | 3.83447800  | -3.83989900 | -1.61872600 |
| C | 3.43282800  | -2.91690800 | -2.58600400 |
| C | 2.48208800  | -1.94968400 | -2.24993300 |
| H | 3.62689200  | -4.53209100 | 0.40653000  |
| H | 4.57468100  | -4.59773700 | -1.86172700 |
| H | 3.85434800  | -2.94333100 | -3.58637800 |
| H | 2.15550100  | -1.21448700 | -2.98004800 |
| O | 1.75729000  | -2.72561400 | 1.23148500  |
| C | 2.15583900  | -3.62543400 | 2.26779000  |
| H | 1.57217600  | -3.33946900 | 3.14339100  |
| H | 3.22469800  | -3.52204000 | 2.48779000  |
| H | 1.92935300  | -4.66370600 | 1.99836900  |
| C | -3.67950400 | -1.11844300 | 0.08041200  |
| C | -3.70905700 | -1.01683000 | 1.61337600  |
| C | -3.26253000 | -2.43658200 | -0.20119500 |
| C | -3.01891700 | -3.12496000 | 1.13693900  |
| C | -2.27569000 | -1.06033300 | 2.20998700  |
| C | -4.18226700 | -2.46515100 | 1.94547700  |
| C | -1.79629400 | -2.50825300 | 1.87517100  |
| C | -2.47554800 | 0.33988200  | -1.02328700 |
| C | -1.09909600 | 0.19784200  | -0.75333100 |
| C | -0.38018200 | -0.97514300 | -1.05276600 |

|   |             |             |             |
|---|-------------|-------------|-------------|
| S | -1.11610000 | -2.37152500 | -1.66604200 |
| S | -0.06472700 | 1.37576000  | 0.09104300  |
| C | 1.34940200  | 0.28335600  | -0.04111200 |
| N | 0.95893100  | -0.90729600 | -0.64726400 |
| H | -2.77600900 | -0.23792300 | -1.89291800 |
| C | -3.23027300 | 1.60136500  | -0.84275800 |
| H | -3.60194100 | -2.98931900 | -1.06814100 |
| H | -4.49605000 | -0.68393500 | -0.48732900 |
| H | -4.32684500 | -0.19990600 | 1.99425900  |
| H | -3.00315800 | -4.21621700 | 1.08348700  |
| H | -1.62007600 | -0.29220400 | 1.79874200  |
| H | -2.32771000 | -0.89981800 | 3.29322600  |
| H | -4.15502900 | -2.70544000 | 3.01822700  |
| H | -5.17588300 | -2.69803300 | 1.54750500  |
| H | -0.88821800 | -2.53318500 | 1.27197500  |
| H | -1.60198500 | -3.08189800 | 2.78905900  |
| C | -4.10723000 | 2.00929900  | -1.86645400 |
| C | -4.84561700 | 3.18871700  | -1.75440300 |
| C | -4.73364400 | 3.98042900  | -0.60680200 |
| C | -3.88194100 | 3.57768400  | 0.42717600  |
| C | -3.14032500 | 2.39998600  | 0.31301000  |
| H | -4.20142000 | 1.39887800  | -2.76178800 |
| H | -5.50821900 | 3.48797900  | -2.56238200 |
| H | -5.30898200 | 4.89789700  | -0.51590600 |
| H | -3.79780700 | 4.17785400  | 1.32947300  |
| H | -2.50857900 | 2.09293800  | 1.14074000  |
| N | 2.54386400  | 0.52272000  | 0.34123700  |
| C | 2.87660800  | 1.77152500  | 0.90481700  |
| C | 2.99201900  | 1.91534200  | 2.29257200  |
| C | 3.39910800  | 3.12511800  | 2.86630300  |
| C | 3.71084500  | 4.20596500  | 2.04188700  |
| C | 3.61724300  | 4.08194600  | 0.64934100  |
| C | 3.20469000  | 2.87423800  | 0.07470300  |
| H | 2.75772100  | 1.05759100  | 2.91766400  |
| H | 3.47409800  | 3.21417600  | 3.94668400  |
| H | 4.03275800  | 5.15152000  | 2.47034700  |
| H | 3.86817500  | 4.92985300  | 0.02173600  |
| O | 3.09192600  | 2.66037800  | -1.27081400 |
| C | 3.41402400  | 3.72873900  | -2.15979800 |
| H | 3.25686700  | 3.33322400  | -3.16433400 |

|   |            |            |             |
|---|------------|------------|-------------|
| H | 4.46080000 | 4.03656700 | -2.04717400 |
| H | 2.75582500 | 4.59124000 | -1.99871700 |

|                                              |                             |
|----------------------------------------------|-----------------------------|
| Zero-point correction=                       | 0.541256 (Hartree/Particle) |
| Thermal correction to Energy=                | 0.573809                    |
| Thermal correction to Enthalpy=              | 0.574753                    |
| Thermal correction to Gibbs Free Energy=     | 0.474269                    |
| Sum of electronic and zero-point Energies=   | -2255.094986                |
| Sum of electronic and thermal Energies=      | -2255.062433                |
| Sum of electronic and thermal Enthalpies=    | -2255.061489                |
| Sum of electronic and thermal Free Energies= | -2255.161973                |

M06-2X/6-31+G(d)// B3LYP/6-31+G(d) (IEFPCM)

HF= -2254.9491486

### **TS(P,S,S,S)-n**

B3LYP/6-31+G\* optimized with IEFPCM (dichloromethane;  $\epsilon=8.93$ )

|   |             |             |             |
|---|-------------|-------------|-------------|
| C | 2.16583000  | -1.90546400 | -0.11212900 |
| C | 2.81257200  | -2.37888800 | -1.27254600 |
| C | 3.87437900  | -3.28344200 | -1.13799700 |
| C | 4.28604200  | -3.69233700 | 0.13512700  |
| C | 3.65317400  | -3.21140900 | 1.28247900  |
| C | 2.59001200  | -2.31387900 | 1.14882700  |
| H | 4.38552100  | -3.66647100 | -2.01371600 |
| H | 5.11320500  | -4.39206600 | 0.22140400  |
| H | 3.97904400  | -3.52818900 | 2.26864100  |
| H | 2.08113900  | -1.92069500 | 2.02377800  |
| O | 2.34363700  | -1.90656600 | -2.45816600 |
| C | 2.94831500  | -2.36946800 | -3.66851200 |
| H | 2.41267200  | -1.86573000 | -4.47374400 |
| H | 2.83559400  | -3.45471700 | -3.77353200 |
| H | 4.00982400  | -2.09884000 | -3.70663700 |
| C | -3.45374700 | -1.37705000 | 0.66476400  |
| C | -3.46200300 | -0.66375000 | 2.02514500  |
| C | -2.87959100 | -2.64303900 | 0.90625000  |
| C | -2.53001500 | -2.69962100 | 2.39051500  |
| C | -2.02064500 | -0.31333700 | 2.48964300  |
| C | -3.74751800 | -1.89144200 | 2.94327300  |
| C | -1.37703800 | -1.71446300 | 2.73495000  |

|   |             |             |             |
|---|-------------|-------------|-------------|
| C | -2.45223600 | -0.37736900 | -1.02812400 |
| C | -1.06976200 | -0.24374400 | -0.79235500 |
| C | -0.22252800 | -1.34974900 | -0.58943200 |
| S | -0.78895500 | -2.94453700 | -0.55526700 |
| S | -0.18526800 | 1.28415300  | -0.56068000 |
| C | 1.33366200  | 0.39579300  | -0.22542000 |
| N | 1.08221200  | -0.97405100 | -0.24385100 |
| H | -2.68588900 | -1.29882800 | -1.55376600 |
| C | -3.35839000 | 0.74997900  | -1.34358600 |
| H | -3.17339100 | -3.53290200 | 0.36329300  |
| H | -4.32564700 | -1.29485000 | 0.02398500  |
| H | -4.16567800 | 0.16988600  | 2.08841100  |
| H | -2.38275200 | -3.71045400 | 2.77819400  |
| H | -1.47223900 | 0.28449900  | 1.76123800  |
| H | -2.06921500 | 0.26777600  | 3.41791100  |
| H | -3.66953200 | -1.66909500 | 4.01736700  |
| H | -4.71298100 | -2.36805900 | 2.74195500  |
| H | -0.49053800 | -1.89424100 | 2.12505800  |
| H | -1.09084200 | -1.84341200 | 3.78498400  |
| C | -4.27959900 | 0.59382400  | -2.39735600 |
| C | -5.15874100 | 1.62154600  | -2.74343200 |
| C | -5.14630600 | 2.82504200  | -2.03092800 |
| C | -4.25204300 | 2.98658000  | -0.96733000 |
| C | -3.36906900 | 1.96059000  | -0.62476700 |
| H | -4.29658600 | -0.33941600 | -2.95573000 |
| H | -5.85270200 | 1.48161000  | -3.56820000 |
| H | -5.83081500 | 3.62617400  | -2.29670100 |
| H | -4.24433000 | 3.91213900  | -0.39749800 |
| H | -2.70412800 | 2.09819500  | 0.22235700  |
| N | 2.48952100  | 0.89710700  | -0.01926400 |
| C | 2.67382700  | 2.29477000  | -0.00608700 |
| C | 3.18144500  | 2.95336900  | -1.13236800 |
| C | 3.45299400  | 4.32594500  | -1.11046000 |
| C | 3.22683400  | 5.05260800  | 0.05820600  |
| C | 2.73126300  | 4.41328600  | 1.20235800  |
| C | 2.45517100  | 3.04125800  | 1.18010000  |
| H | 3.36474200  | 2.36751200  | -2.02933200 |
| H | 3.84127000  | 4.81550300  | -1.99947000 |
| H | 3.43614600  | 6.11850800  | 0.09393100  |
| H | 2.56513900  | 4.99157600  | 2.10450600  |

|   |            |            |            |
|---|------------|------------|------------|
| O | 1.97723000 | 2.33396600 | 2.24873200 |
| C | 1.74664700 | 3.02683500 | 3.47416100 |
| H | 1.37843400 | 2.27470900 | 4.17333900 |
| H | 0.99136700 | 3.81256400 | 3.34974400 |
| H | 2.67404100 | 3.46505700 | 3.86284100 |

Zero-point correction= 0.541206 (Hartree/Particle)  
 Thermal correction to Energy= 0.573790  
 Thermal correction to Enthalpy= 0.574734  
 Thermal correction to Gibbs Free Energy= 0.473690  
 Sum of electronic and zero-point Energies= -2255.095991  
 Sum of electronic and thermal Energies= -2255.063408  
 Sum of electronic and thermal Enthalpies= -2255.062463  
 Sum of electronic and thermal Free Energies= -2255.163508

M06-2X/6-31+G(d)// B3LYP/6-31+G(d) (IEFPCM)

HF= -2254.9505211

### **TS-rot-4b-S**

B3LYP/6-31+G\* optimized with IEFPCM (dichloromethane;  $\epsilon=8.93$ )

|   |            |             |             |
|---|------------|-------------|-------------|
| N | 2.57044900 | -0.04147300 | -1.27292800 |
| C | 3.16684600 | -1.30660100 | -1.45088300 |
| C | 3.12720100 | -1.90572300 | -2.71593300 |
| C | 3.75525400 | -3.13132200 | -2.95689600 |
| C | 4.45530900 | -3.75951800 | -1.92633100 |
| C | 4.53232600 | -3.16534200 | -0.66082000 |
| C | 3.89817500 | -1.94147600 | -0.41543700 |
| H | 2.58784600 | -1.39402600 | -3.50859400 |
| H | 3.69888900 | -3.58394200 | -3.94295600 |
| H | 4.95278900 | -4.71039000 | -2.09766900 |
| H | 5.08934400 | -3.66040000 | 0.12672700  |
| O | 3.94142000 | -1.27736800 | 0.77863400  |
| C | 4.63891600 | -1.87688100 | 1.87034900  |
| H | 4.52727100 | -1.18493300 | 2.70611000  |
| H | 5.70339400 | -2.00333200 | 1.63858300  |
| H | 4.19916400 | -2.84605200 | 2.13448800  |
| C | 1.76532200 | 2.45904400  | 0.21163500  |
| C | 1.24399900 | 3.72821100  | 0.58103400  |
| C | 2.09423300 | 4.73464200  | 1.06012800  |

|   |             |             |             |
|---|-------------|-------------|-------------|
| C | 3.46489400  | 4.52123200  | 1.20015400  |
| C | 3.98731200  | 3.27578500  | 0.86565800  |
| C | 3.14709400  | 2.27064500  | 0.38361200  |
| H | 1.67637900  | 5.69743300  | 1.32815600  |
| H | 4.10246600  | 5.32006500  | 1.56855800  |
| H | 5.04824400  | 3.06810200  | 0.97364900  |
| H | 3.58679200  | 1.31805000  | 0.13310400  |
| O | -0.09879900 | 3.92219500  | 0.46661800  |
| C | -0.67607300 | 5.16978900  | 0.84735300  |
| H | -1.74579100 | 5.05844900  | 0.66561800  |
| H | -0.28241000 | 5.99019400  | 0.23630400  |
| H | -0.50230900 | 5.37747000  | 1.90961300  |
| C | -2.97192400 | -0.49028500 | -0.69464800 |
| C | -4.51592600 | -0.58558200 | -0.54046800 |
| C | -2.78689000 | 0.86315900  | -1.45886800 |
| C | -4.23835300 | 1.36629500  | -1.65696700 |
| C | -5.11671400 | -0.89326300 | -1.93373600 |
| C | -4.92210300 | 0.89370200  | -0.35571200 |
| C | -4.90926000 | 0.44918000  | -2.71207500 |
| C | -2.19247300 | -0.53561100 | 0.65528400  |
| C | -0.77156900 | -0.07834300 | 0.42507900  |
| C | -0.45797100 | 1.17580500  | 0.02702300  |
| S | -1.80112300 | 2.17980200  | -0.56410900 |
| S | 0.59024000  | -1.19761000 | 0.24734000  |
| C | 1.53365100  | 0.11999500  | -0.55289500 |
| N | 0.93551500  | 1.37629100  | -0.29219900 |
| H | -2.64294500 | 0.22696000  | 1.30254300  |
| C | -2.29600400 | -1.86543100 | 1.39585100  |
| H | -2.27685300 | 0.71488600  | -2.41417900 |
| H | -2.59789900 | -1.30456100 | -1.32469700 |
| H | -4.83394800 | -1.27975600 | 0.24268900  |
| H | -4.31081000 | 2.43309200  | -1.89150500 |
| H | -4.62422900 | -1.74442700 | -2.41781400 |
| H | -6.18183500 | -1.13715100 | -1.84631300 |
| H | -6.00858200 | 1.04101500  | -0.36777600 |
| H | -4.51588800 | 1.36213000  | 0.54646700  |
| H | -4.29018000 | 0.32998700  | -3.60848800 |
| H | -5.86711900 | 0.87650700  | -3.02988600 |
| C | -2.52969000 | -1.86026800 | 2.78012700  |
| C | -2.61560700 | -3.05313900 | 3.50380800  |

|   |             |             |             |
|---|-------------|-------------|-------------|
| C | -2.47065000 | -4.28032800 | 2.84977500  |
| C | -2.23942000 | -4.30089900 | 1.47102700  |
| C | -2.15294900 | -3.10475000 | 0.75167400  |
| H | -2.64525000 | -0.90990200 | 3.29721800  |
| H | -2.79861200 | -3.02230400 | 4.57496500  |
| H | -2.53929100 | -5.21071200 | 3.40757600  |
| H | -2.12634500 | -5.24882700 | 0.95091300  |
| H | -1.97259100 | -3.14737500 | -0.31863500 |

|                                              |                             |
|----------------------------------------------|-----------------------------|
| Zero-point correction=                       | 0.545025 (Hartree/Particle) |
| Thermal correction to Energy=                | 0.576078                    |
| Thermal correction to Enthalpy=              | 0.577023                    |
| Thermal correction to Gibbs Free Energy=     | 0.480960                    |
| Sum of electronic and zero-point Energies=   | -2255.131046                |
| Sum of electronic and thermal Energies=      | -2255.099992                |
| Sum of electronic and thermal Enthalpies=    | -2255.099048                |
| Sum of electronic and thermal Free Energies= | -2255.195110                |

M06-2X/6-31+G(d)// B3LYP/6-31+G(d) (IEFPCM)

HF= -2255.0133823

### **TS-rot-4b-N**

B3LYP/6-31+G\* optimized with IEFPCM (dichloromethane;  $\epsilon=8.93$ )

|   |             |             |             |
|---|-------------|-------------|-------------|
| N | -2.29458700 | -0.24036700 | 1.12019000  |
| C | -2.74676700 | -1.53369800 | 1.41009900  |
| C | -2.84197600 | -1.89105700 | 2.76451600  |
| C | -3.30917900 | -3.14579200 | 3.15925000  |
| C | -3.72932900 | -4.05758400 | 2.18904700  |
| C | -3.68282200 | -3.71336100 | 0.83374600  |
| C | -3.19855700 | -2.46118200 | 0.43379500  |
| H | -2.52853200 | -1.15884000 | 3.50376700  |
| H | -3.35280300 | -3.40103900 | 4.21434400  |
| H | -4.10341700 | -5.03659700 | 2.47642600  |
| H | -4.02450600 | -4.42703100 | 0.09249400  |
| O | -3.14892100 | -2.04437900 | -0.86590000 |
| C | -3.60037800 | -2.92872200 | -1.89109000 |
| H | -3.46816000 | -2.38444100 | -2.82696600 |
| H | -4.65977100 | -3.17904900 | -1.75766500 |
| H | -3.00225100 | -3.84747900 | -1.91307900 |



|   |             |             |             |
|---|-------------|-------------|-------------|
| C | -1.74519200 | 2.48108600  | -0.49898800 |
| C | -3.17096100 | 2.53669400  | -0.53587900 |
| C | -3.81207500 | 3.70994800  | -0.95933800 |
| C | -3.09632800 | 4.81911400  | -1.41262600 |
| C | -1.70897700 | 4.74483700  | -1.46910200 |
| C | -1.06022300 | 3.58998100  | -1.02788200 |
| H | -4.89468800 | 3.74819900  | -0.95607100 |
| H | -3.62692700 | 5.70946600  | -1.73816800 |
| H | -1.11758200 | 5.56904900  | -1.85752700 |
| H | 0.01663100  | 3.56160000  | -1.12101300 |
| O | -3.87081900 | 1.42147300  | -0.19898700 |
| C | -5.29504600 | 1.44969900  | -0.21869200 |
| H | -5.60746500 | 0.45420700  | 0.09991700  |
| H | -5.67649200 | 1.64841700  | -1.22787800 |
| H | -5.68963400 | 2.19732600  | 0.48012400  |
| C | 3.10278600  | 0.12508900  | 0.74127400  |
| C | 4.65281700  | 0.24841300  | 0.69553300  |
| C | 2.67927800  | 1.45881100  | 1.44802300  |
| C | 4.02674400  | 2.16860400  | 1.72229200  |
| C | 5.19173000  | 0.06386700  | 2.13497600  |
| C | 4.85916800  | 1.76506700  | 0.48627200  |
| C | 4.74009100  | 1.38003800  | 2.85107300  |
| C | 2.44618600  | -0.09006600 | -0.66158600 |
| C | 0.95897000  | 0.15848700  | -0.56549300 |
| C | 0.45256400  | 1.35252200  | -0.19136200 |
| S | 1.56828700  | 2.58173500  | 0.44121400  |
| S | -0.29004900 | -1.10491500 | -0.58973100 |
| C | -1.40698100 | 0.05685500  | 0.26891700  |
| N | -0.96747600 | 1.38399300  | 0.00558500  |
| H | 2.83697400  | 0.70205600  | -1.31310400 |
| C | 2.81403800  | -1.42121800 | -1.30765500 |
| H | 2.12565200  | 1.26543000  | 2.36987600  |
| H | 2.80356700  | -0.71418900 | 1.37814800  |
| H | 5.11897700  | -0.41281200 | -0.04014600 |
| H | 3.93192200  | 3.23975700  | 1.92567700  |
| H | 4.79324000  | -0.83770200 | 2.61402600  |
| H | 6.28415200  | -0.02489400 | 2.12613600  |
| H | 5.91035400  | 2.06658300  | 0.56477400  |
| H | 4.45505300  | 2.14730600  | -0.45676000 |
| H | 4.08022900  | 1.19512300  | 3.70631400  |

|   |            |             |             |
|---|------------|-------------|-------------|
| H | 5.60138200 | 1.94854400  | 3.21968300  |
| C | 3.26762400 | -1.43965600 | -2.63552000 |
| C | 3.60723200 | -2.64014000 | -3.26694800 |
| C | 3.49977800 | -3.84972800 | -2.57458000 |
| C | 3.05014700 | -3.84632600 | -1.25043800 |
| C | 2.71087200 | -2.64353500 | -0.62377500 |
| H | 3.35554500 | -0.50313400 | -3.18234700 |
| H | 3.95716300 | -2.62799500 | -4.29612900 |
| H | 3.76490800 | -4.78521100 | -3.06046200 |
| H | 2.96268900 | -4.78069800 | -0.70163200 |
| H | 2.36293800 | -2.66548100 | 0.40504300  |

Zero-point correction= 0.544876 (Hartree/Particle)  
 Thermal correction to Energy= 0.575973  
 Thermal correction to Enthalpy= 0.576917  
 Thermal correction to Gibbs Free Energy= 0.480965  
 Sum of electronic and zero-point Energies= -2255.125168  
 Sum of electronic and thermal Energies= -2255.094072  
 Sum of electronic and thermal Enthalpies= -2255.093128  
 Sum of electronic and thermal Free Energies= -2255.189080

M06-2X/6-31+G(d)// B3LYP/6-31+G(d) (IEFPCM)

HF= -2255.0059644

## PRODUCTS

### (M,S,R,R)-x

B3LYP/6-31+G\* optimized with IEFPCM (dichloromethane;  $\epsilon=8.93$ )

|   |             |             |             |
|---|-------------|-------------|-------------|
| N | -2.92986000 | 0.27044200  | 0.17999600  |
| C | -3.70670700 | -0.85995500 | 0.49311500  |
| C | -4.19044500 | -1.04511200 | 1.79483900  |
| C | -5.02764600 | -2.11897700 | 2.11812700  |
| C | -5.40327500 | -3.02098200 | 1.12310800  |
| C | -4.94791200 | -2.84987900 | -0.19102400 |
| C | -4.10813900 | -1.77774200 | -0.51397900 |
| H | -3.89673800 | -0.32534700 | 2.55466500  |
| H | -5.38179000 | -2.24219300 | 3.13817100  |
| H | -6.05455000 | -3.85971400 | 1.35505500  |
| H | -5.25470100 | -3.55568500 | -0.95509400 |

|   |             |             |             |
|---|-------------|-------------|-------------|
| O | -3.63171400 | -1.52828000 | -1.77210300 |
| C | -4.00117900 | -2.41315800 | -2.82752000 |
| H | -3.51509200 | -2.02347300 | -3.72321700 |
| H | -5.08810800 | -2.42273400 | -2.97594700 |
| H | -3.64701200 | -3.43298700 | -2.63326500 |
| C | -1.35547700 | 2.55672700  | -0.49270900 |
| C | -1.40006500 | 3.39438500  | 0.64207100  |
| C | -1.90156900 | 4.69599600  | 0.50666800  |
| C | -2.35122300 | 5.14535400  | -0.73991900 |
| C | -2.30833200 | 4.31528600  | -1.86112300 |
| C | -1.80887300 | 3.01644700  | -1.72705000 |
| H | -1.94475700 | 5.36199400  | 1.36084300  |
| H | -2.73752900 | 6.15762600  | -0.82577500 |
| H | -2.66004500 | 4.66852000  | -2.82578500 |
| H | -1.76944100 | 2.34343800  | -2.57900700 |
| O | -0.93525300 | 2.86146500  | 1.80304700  |
| C | -0.96664000 | 3.66403500  | 2.98610800  |
| H | -0.55572300 | 3.03534300  | 3.77670800  |
| H | -1.99394200 | 3.94976000  | 3.23972500  |
| H | -0.34744200 | 4.56093900  | 2.86932800  |
| C | 3.24742600  | -0.12013700 | 0.30237300  |
| C | 4.70356900  | -0.35450600 | -0.19223000 |
| C | 3.10052700  | 1.43962900  | 0.17228900  |
| C | 4.47516600  | 1.89095300  | -0.37825900 |
| C | 5.67639300  | 0.18402400  | 0.88418800  |
| C | 4.85324500  | 0.71215200  | -1.30004300 |
| C | 5.50554500  | 1.73514600  | 0.76926900  |
| C | 2.19020800  | -0.98347600 | -0.46268700 |
| C | 0.80480600  | -0.41443800 | -0.26669300 |
| C | 0.50996000  | 0.88195200  | -0.49293200 |
| S | 1.74189400  | 2.05437000  | -0.95206800 |
| S | -0.65888900 | -1.31877300 | 0.16342500  |
| C | -1.66675600 | 0.16014700  | -0.01339100 |
| N | -0.84676100 | 1.22327300  | -0.36687500 |
| H | 2.41920200  | -0.89268500 | -1.53454800 |
| C | 2.30354000  | -2.46025200 | -0.10300200 |
| H | 2.88490900  | 1.89175700  | 1.14321500  |
| H | 3.15807500  | -0.37696100 | 1.36336200  |
| H | 4.89889800  | -1.38998500 | -0.48463100 |
| H | 4.46628900  | 2.88786800  | -0.82990500 |

|   |            |             |             |
|---|------------|-------------|-------------|
| H | 5.43818900 | -0.19613300 | 1.88411100  |
| H | 6.70520400 | -0.11719100 | 0.65570600  |
| H | 5.87632300 | 0.78528800  | -1.68725700 |
| H | 4.16710900 | 0.58118000  | -2.14286800 |
| H | 5.15935300 | 2.19631500  | 1.70131000  |
| H | 6.44920600 | 2.22031800  | 0.49549600  |
| C | 2.59502300 | -3.40579500 | -1.09682600 |
| C | 2.71032800 | -4.76524200 | -0.78770700 |
| C | 2.53336000 | -5.20157600 | 0.52811100  |
| C | 2.23951500 | -4.26927000 | 1.52888300  |
| C | 2.12651400 | -2.91223000 | 1.21519700  |
| H | 2.73194900 | -3.07546700 | -2.12438600 |
| H | 2.93767900 | -5.47966700 | -1.57493700 |
| H | 2.62164700 | -6.25701500 | 0.77245900  |
| H | 2.09670400 | -4.59762400 | 2.55534900  |
| H | 1.89481000 | -2.20356500 | 2.00651600  |

Zero-point correction= 0.545462 (Hartree/Particle)  
 Thermal correction to Energy= 0.577605  
 Thermal correction to Enthalpy= 0.578549  
 Thermal correction to Gibbs Free Energy= 0.478388  
 Sum of electronic and zero-point Energies= -2255.164151  
 Sum of electronic and thermal Energies= -2255.132008  
 Sum of electronic and thermal Enthalpies= -2255.131064  
 Sum of electronic and thermal Free Energies= -2255.231226

M06-2X/6-31+G(d)// B3LYP/6-31+G(d) (IEFPCM)

HF=-2255.0349223

**(P,S,R,R)-x**

B3LYP/6-31+G\* optimized with IEFPCM (dichloromethane;  $\epsilon=8.93$ )

|   |            |             |             |
|---|------------|-------------|-------------|
| N | 2.95315600 | 0.05954500  | 0.01463600  |
| C | 3.66639900 | -1.14875900 | 0.11680900  |
| C | 4.32642200 | -1.48066800 | 1.30722100  |
| C | 5.10897200 | -2.63610600 | 1.41149600  |
| C | 5.24982500 | -3.47297000 | 0.30487100  |
| C | 4.61315800 | -3.15674900 | -0.90279700 |
| C | 3.82754200 | -2.00307000 | -1.00603100 |
| H | 4.21476500 | -0.81044100 | 2.15565800  |

|   |             |             |             |
|---|-------------|-------------|-------------|
| H | 5.60343200  | -2.87278200 | 2.34989100  |
| H | 5.85622400  | -4.37289600 | 0.36657700  |
| H | 4.73759800  | -3.81364200 | -1.75658900 |
| O | 3.18337000  | -1.61275800 | -2.14869100 |
| C | 3.30055400  | -2.43245000 | -3.30956400 |
| H | 2.71600000  | -1.93294300 | -4.08367800 |
| H | 2.89142900  | -3.43455900 | -3.13096000 |
| H | 4.34485000  | -2.51376400 | -3.63555200 |
| C | 1.50884900  | 2.50920000  | -0.22896400 |
| C | 1.73590300  | 3.31004600  | 0.91023100  |
| C | 2.32806200  | 4.57062300  | 0.74999900  |
| C | 2.69400800  | 5.01209400  | -0.52580300 |
| C | 2.47584900  | 4.21547400  | -1.65158000 |
| C | 1.88043600  | 2.96117600  | -1.49329400 |
| H | 2.50956500  | 5.20756400  | 1.60805800  |
| H | 3.15433400  | 5.99093500  | -0.63183100 |
| H | 2.76322000  | 4.56302600  | -2.63936200 |
| H | 1.69885900  | 2.31748300  | -2.34920000 |
| O | 1.34828900  | 2.78296200  | 2.10282800  |
| C | 1.56261300  | 3.54588900  | 3.29330300  |
| H | 1.18378900  | 2.92783900  | 4.10791100  |
| H | 1.00887900  | 4.49126100  | 3.26044300  |
| H | 2.62998500  | 3.74276400  | 3.44590700  |
| C | -3.20451600 | -0.10105900 | -0.57769700 |
| C | -4.70899200 | -0.09527800 | -0.18134200 |
| C | -2.96026000 | 1.39970400  | -0.97477800 |
| C | -4.34016300 | 2.06527900  | -0.75203700 |
| C | -5.55281500 | 0.07254400  | -1.46720300 |
| C | -4.87284900 | 1.29443900  | 0.47432900  |
| C | -5.28163100 | 1.55887200  | -1.87494400 |
| C | -2.27727800 | -0.67795500 | 0.54372700  |
| C | -0.84262500 | -0.27182100 | 0.30380400  |
| C | -0.47446900 | 1.00867400  | 0.09533500  |
| S | -1.65707600 | 2.31040600  | 0.00857600  |
| S | 0.57564700  | -1.33636400 | 0.30324400  |
| C | 1.67154700  | 0.06866800  | 0.05631700  |
| N | 0.90508100  | 1.21934600  | -0.07512200 |
| H | -2.58281500 | -0.19918200 | 1.48513900  |
| C | -2.46947400 | -2.17944800 | 0.72117000  |
| H | -2.63481600 | 1.48055700  | -2.01464400 |

|   |             |             |             |
|---|-------------|-------------|-------------|
| H | -3.04587800 | -0.71559500 | -1.47032400 |
| H | -4.99795100 | -0.95701600 | 0.42700400  |
| H | -4.29846900 | 3.15586000  | -0.67024400 |
| H | -5.26459800 | -0.64088900 | -2.24764300 |
| H | -6.61516300 | -0.08910200 | -1.25122000 |
| H | -5.91647300 | 1.53578900  | 0.70816400  |
| H | -4.26869100 | 1.43827900  | 1.37573300  |
| H | -4.82742500 | 1.65177100  | -2.86799900 |
| H | -6.20748900 | 2.14499700  | -1.88296000 |
| C | -2.89024200 | -2.69224500 | 1.95679500  |
| C | -3.07635700 | -4.06617200 | 2.14217900  |
| C | -2.84245600 | -4.95304600 | 1.08771300  |
| C | -2.42084300 | -4.45527300 | -0.14980100 |
| C | -2.23682000 | -3.08167100 | -0.33001800 |
| H | -3.07287800 | -2.00967500 | 2.78404800  |
| H | -3.40321100 | -4.44023800 | 3.10917000  |
| H | -2.98551100 | -6.02138800 | 1.22782200  |
| H | -2.23321900 | -5.13604100 | -0.97634800 |
| H | -1.90651400 | -2.71414300 | -1.29847200 |

|                                              |                             |
|----------------------------------------------|-----------------------------|
| Zero-point correction=                       | 0.545301 (Hartree/Particle) |
| Thermal correction to Energy=                | 0.577478                    |
| Thermal correction to Enthalpy=              | 0.578422                    |
| Thermal correction to Gibbs Free Energy=     | 0.477761                    |
| Sum of electronic and zero-point Energies=   | -2255.164032                |
| Sum of electronic and thermal Energies=      | -2255.131855                |
| Sum of electronic and thermal Enthalpies=    | -2255.130911                |
| Sum of electronic and thermal Free Energies= | -2255.231572                |

M06-2X/6-31+G(d)// B3LYP/6-31+G(d) (IEFPCM)

HF=-2255.0345436

**(M,S,S,S)-x**

B3LYP/6-31+G\* optimized with IEFPCM (dichloromethane;  $\epsilon=8.93$ )

|   |            |             |             |
|---|------------|-------------|-------------|
| C | 1.41290400 | -2.41342300 | -0.69078700 |
| C | 1.43675900 | -3.28945300 | 0.41523800  |
| C | 2.01790200 | -4.55602700 | 0.26675200  |
| C | 2.56364700 | -4.93415200 | -0.96503900 |
| C | 2.54143700 | -4.06604900 | -2.05762400 |

|   |             |             |             |
|---|-------------|-------------|-------------|
| C | 1.96498300  | -2.80093300 | -1.90973900 |
| H | 2.04821600  | -5.24977300 | 1.09912300  |
| H | 3.00964100  | -5.92057100 | -1.06188100 |
| H | 2.96862000  | -4.36360800 | -3.01051000 |
| H | 1.93971800  | -2.09970200 | -2.73917600 |
| O | 0.87373100  | -2.82653800 | 1.56202600  |
| C | 0.88245700  | -3.66819700 | 2.71779500  |
| H | 0.38967100  | -3.09279800 | 3.50211500  |
| H | 1.90812800  | -3.90436800 | 3.02378400  |
| H | 0.32476000  | -4.59391100 | 2.53448300  |
| C | -3.43725900 | -0.03308000 | -0.42883200 |
| C | -3.75464800 | -0.11476200 | 1.09574700  |
| C | -3.24163500 | -1.55087500 | -0.80231300 |
| C | -3.56157200 | -2.29310700 | 0.51864900  |
| C | -5.20648600 | -0.63764600 | 1.23473100  |
| C | -5.08120200 | -2.13182300 | 0.78814800  |
| C | -2.29534200 | 0.93589300  | -0.90342200 |
| C | -0.92067400 | 0.43107800  | -0.53894300 |
| C | -0.52948700 | -0.83095700 | -0.80732600 |
| S | -1.59016500 | -2.03982700 | -1.52776500 |
| S | 0.44682100  | 1.37894100  | 0.08343700  |
| C | 1.54292800  | -0.03801700 | -0.05635100 |
| N | 0.82159000  | -1.11583900 | -0.55035700 |
| H | -2.35023600 | 0.88398000  | -2.00245100 |
| C | -2.59211500 | 2.38549900  | -0.53835200 |
| H | -3.92421600 | -1.85103000 | -1.60240300 |
| H | -4.32849200 | 0.32786400  | -0.95579600 |
| H | -5.53842800 | -0.56481200 | 2.27689000  |
| H | -5.91566500 | -0.06785600 | 0.62371700  |
| H | -5.39710800 | -2.81529300 | 1.58444900  |
| H | -5.68502600 | -2.36355100 | -0.09728500 |
| C | -2.32308700 | 2.92947900  | 0.72875100  |
| C | -2.63840900 | 4.26014600  | 1.02198300  |
| C | -3.23683200 | 5.07353700  | 0.05553700  |
| C | -3.51344800 | 4.54546800  | -1.20901300 |
| C | -3.18997100 | 3.21700100  | -1.49920300 |
| H | -1.86069800 | 2.31911400  | 1.49869100  |
| H | -2.41508000 | 4.65827100  | 2.00862200  |
| H | -3.48148100 | 6.10762600  | 0.28411700  |
| H | -3.97421800 | 5.16703500  | -1.97270700 |

|   |             |             |             |
|---|-------------|-------------|-------------|
| H | -3.40140100 | 2.81985100  | -2.48999800 |
| C | -2.95419000 | -1.34645400 | 1.57378000  |
| H | -3.20760600 | -1.63930800 | 2.60008300  |
| H | -1.87002500 | -1.23746600 | 1.49632800  |
| H | -3.57965900 | 0.81758500  | 1.63447200  |
| H | -3.21752400 | -3.33052100 | 0.52449500  |
| N | 2.78214300  | -0.10031800 | 0.26606400  |
| C | 3.45915100  | 1.04446500  | 0.72612600  |
| C | 3.73054000  | 1.20701000  | 2.09073100  |
| C | 4.47441400  | 2.29414300  | 2.56350400  |
| C | 4.96965200  | 3.23307100  | 1.65904300  |
| C | 4.72406700  | 3.08748700  | 0.28705000  |
| C | 3.97623700  | 2.00276900  | -0.18533300 |
| H | 3.34782100  | 0.45816100  | 2.77949600  |
| H | 4.66497700  | 2.39855900  | 3.62833700  |
| H | 5.55246600  | 4.08175600  | 2.00760600  |
| H | 5.12072700  | 3.82233300  | -0.40465700 |
| O | 3.69875600  | 1.77889500  | -1.50615900 |
| C | 4.18775000  | 2.70827400  | -2.47101600 |
| H | 3.85014700  | 2.33390900  | -3.43864500 |
| H | 5.28373900  | 2.75432600  | -2.45876200 |
| H | 3.77487400  | 3.71043400  | -2.30180700 |

|                                              |                             |
|----------------------------------------------|-----------------------------|
| Zero-point correction=                       | 0.545569 (Hartree/Particle) |
| Thermal correction to Energy=                | 0.577636                    |
| Thermal correction to Enthalpy=              | 0.578580                    |
| Thermal correction to Gibbs Free Energy=     | 0.478323                    |
| Sum of electronic and zero-point Energies=   | -2255.157302                |
| Sum of electronic and thermal Energies=      | -2255.125235                |
| Sum of electronic and thermal Enthalpies=    | -2255.124291                |
| Sum of electronic and thermal Free Energies= | -2255.224548                |

M06-2X/6-31+G(d)// B3LYP/6-31+G(d) (IEFPCM)

HF=-2255.0293027

**(P.S.S.S)-x**

B3LYP/6-31+G\* optimized with IEFPCM (dichloromethane;  $\epsilon=8.93$ )

|   |            |             |             |
|---|------------|-------------|-------------|
| C | 1.91518600 | -2.17852500 | 0.02183700  |
| C | 2.41485600 | -2.81523300 | -1.13393800 |



|   |             |             |             |
|---|-------------|-------------|-------------|
| C | 3.28028800  | -3.90850900 | -0.98925200 |
| C | 3.64488700  | -4.34494800 | 0.28871700  |
| C | 3.15711700  | -3.70806700 | 1.43155000  |
| C | 2.28967500  | -2.62202400 | 1.28806300  |
| H | 3.67458100  | -4.41808700 | -1.86091000 |
| H | 4.31851900  | -5.19266200 | 0.38290300  |
| H | 3.44472600  | -4.05027900 | 2.42111800  |
| H | 1.89381400  | -2.10528900 | 2.15758500  |
| O | 2.00331200  | -2.30626400 | -2.32620000 |
| C | 2.47280000  | -2.91558500 | -3.53197100 |
| H | 2.01674500  | -2.34677700 | -4.34283100 |
| H | 2.15558100  | -3.96304600 | -3.59297200 |
| H | 3.56444300  | -2.85090700 | -3.60535800 |
| C | -3.32355500 | -0.81649500 | 0.04746500  |
| C | -3.50241200 | -0.31086500 | 1.51104000  |
| C | -2.81193800 | -2.28885400 | 0.27241300  |
| C | -2.83667800 | -2.45259900 | 1.81165700  |
| C | -4.77246500 | -0.99136800 | 2.08188100  |
| C | -4.32485500 | -2.48082600 | 2.25082900  |
| C | -2.45539600 | 0.04313100  | -0.94277000 |
| C | -0.98670100 | 0.00138400  | -0.60056100 |
| C | -0.33980700 | -1.16695900 | -0.41226000 |
| S | -1.15995500 | -2.72331500 | -0.49267000 |
| S | 0.13475600  | 1.36452700  | -0.42115700 |
| C | 1.50791300  | 0.24342300  | -0.12243700 |
| N | 1.03030500  | -1.06005800 | -0.11490500 |
| H | -2.54715000 | -0.49880000 | -1.89661600 |
| C | -3.05035800 | 1.42405200  | -1.19000600 |
| H | -3.46839800 | -3.01473900 | -0.21614400 |
| H | -4.30745800 | -0.86906900 | -0.43384800 |
| H | -5.03779500 | -0.54804000 | 3.04860600  |
| H | -5.63899200 | -0.87841200 | 1.42053200  |
| H | -4.40363700 | -2.80587900 | 3.29445800  |
| H | -4.92117200 | -3.17559400 | 1.64767100  |
| C | -2.90060200 | 2.50032700  | -0.29906000 |
| C | -3.48706700 | 3.74168900  | -0.56545500 |
| C | -4.24179800 | 3.93207300  | -1.72638800 |
| C | -4.40215000 | 2.87018000  | -2.62130400 |
| C | -3.80912300 | 1.63328800  | -2.35329100 |
| H | -2.32006700 | 2.38172800  | 0.61065500  |

|   |             |             |             |
|---|-------------|-------------|-------------|
| H | -3.35143200 | 4.55963000  | 0.13767800  |
| H | -4.69622900 | 4.89763300  | -1.93281500 |
| H | -4.98237300 | 3.00384700  | -3.53086500 |
| H | -3.93320100 | 0.81700600  | -3.06199700 |
| C | -2.39804500 | -1.05481100 | 2.29549400  |
| H | -2.50061300 | -0.93341600 | 3.38074700  |
| H | -1.37943800 | -0.78352800 | 2.00803500  |
| H | -3.51842200 | 0.77579200  | 1.60630200  |
| H | -2.25317400 | -3.30656400 | 2.16482300  |
| N | 2.74129500  | 0.55109900  | 0.04498500  |
| C | 3.14631700  | 1.89833600  | 0.06623700  |
| C | 3.81245700  | 2.45331700  | -1.03417000 |
| C | 4.29537300  | 3.76655000  | -1.00999800 |
| C | 4.12388200  | 4.54099900  | 0.13704900  |
| C | 3.47510700  | 4.00554200  | 1.25781200  |
| C | 2.98902200  | 2.69329500  | 1.23244700  |
| H | 3.94691200  | 1.83130400  | -1.91543900 |
| H | 4.80203900  | 4.17358300  | -1.88101600 |
| H | 4.49436300  | 5.56213600  | 0.17452500  |
| H | 3.35556600  | 4.61732200  | 2.14520600  |
| O | 2.35667200  | 2.08881800  | 2.28501500  |
| C | 2.17671300  | 2.83291600  | 3.48806600  |
| H | 1.66457800  | 2.16008600  | 4.17760000  |
| H | 1.55749500  | 3.72205000  | 3.31649700  |
| H | 3.14045100  | 3.13287000  | 3.91783300  |

|                                              |                             |
|----------------------------------------------|-----------------------------|
| Zero-point correction=                       | 0.545525 (Hartree/Particle) |
| Thermal correction to Energy=                | 0.577555                    |
| Thermal correction to Enthalpy=              | 0.578499                    |
| Thermal correction to Gibbs Free Energy=     | 0.478733                    |
| Sum of electronic and zero-point Energies=   | -2255.157258                |
| Sum of electronic and thermal Energies=      | -2255.125229                |
| Sum of electronic and thermal Enthalpies=    | -2255.124284                |
| Sum of electronic and thermal Free Energies= | -2255.224050                |

M06-2X/6-31+G(d)// B3LYP/6-31+G(d) (IEFPCM)  
HF=-2255.0289276

**(M,S,R,R)-n**

B3LYP/6-31+G\* optimized with IEFPCM (dichloromethane;  $\epsilon=8.93$ )

|   |             |             |             |
|---|-------------|-------------|-------------|
| C | -1.37625400 | 2.53742300  | -0.42687900 |
| C | -1.50965300 | 3.33572800  | 0.72911200  |
| C | -2.03920300 | 4.62731700  | 0.60600700  |
| C | -2.43058400 | 5.10487300  | -0.64972200 |
| C | -2.30169900 | 4.31302600  | -1.79181500 |
| C | -1.77363200 | 3.02420600  | -1.67005400 |
| H | -2.14980800 | 5.26357200  | 1.47666500  |
| H | -2.83991400 | 6.10883400  | -0.72605600 |
| H | -2.60920700 | 4.68792600  | -2.76336500 |
| H | -1.66746900 | 2.38038300  | -2.53870600 |
| O | -1.09924400 | 2.77596300  | 1.89799700  |
| C | -1.24296900 | 3.52802900  | 3.10565400  |
| H | -0.86753600 | 2.88109700  | 3.89920100  |
| H | -2.29534700 | 3.76930900  | 3.29438000  |
| H | -0.64924700 | 4.44872200  | 3.06953600  |
| N | -2.92130100 | 0.19603900  | 0.09691300  |
| C | -3.68464000 | -0.95918700 | 0.34593000  |
| C | -4.22085400 | -1.19030800 | 1.61940400  |
| C | -5.04930100 | -2.28867600 | 1.87579300  |
| C | -5.36269500 | -3.16906800 | 0.84065300  |
| C | -4.85271700 | -2.95298300 | -0.44652700 |
| C | -4.02084800 | -1.85684600 | -0.70217100 |
| H | -3.97558900 | -0.48645000 | 2.41066700  |
| H | -5.44532500 | -2.44738300 | 2.87531000  |
| H | -6.00691200 | -4.02593400 | 1.02011000  |
| H | -5.11104400 | -3.64267900 | -1.24254900 |
| O | -3.49220300 | -1.56464900 | -1.92984600 |
| C | -3.79188400 | -2.42987900 | -3.02309600 |
| H | -3.27082300 | -2.00866500 | -3.88420600 |
| H | -4.86989100 | -2.45647700 | -3.22482100 |
| H | -3.42697900 | -3.44730400 | -2.83610200 |
| C | 3.24995300  | -0.02579500 | 0.53377200  |
| C | 4.76450300  | -0.20928900 | 0.23144900  |
| C | 3.07105900  | 1.53483700  | 0.40686900  |
| C | 4.48710700  | 2.03889300  | 0.03368500  |
| C | 5.08572100  | 0.05919000  | -1.25889600 |
| C | 4.88078200  | 1.60245100  | -1.39806200 |

|   |             |             |             |
|---|-------------|-------------|-------------|
| C | 2.25778600  | -0.91407200 | -0.27330400 |
| C | 0.85216700  | -0.37560900 | -0.12557600 |
| C | 0.53422600  | 0.91591700  | -0.35013900 |
| S | 1.74328400  | 2.13783800  | -0.74854500 |
| S | -0.60991100 | -1.33063500 | 0.18453200  |
| C | -1.64705500 | 0.12244500  | -0.02709100 |
| N | -0.83800100 | 1.21442800  | -0.31224600 |
| H | 2.51274800  | -0.81756600 | -1.33719000 |
| C | 2.39877300  | -2.38731900 | 0.09119400  |
| H | 2.78912800  | 1.94438600  | 1.38002100  |
| H | 3.09009600  | -0.26833900 | 1.59032400  |
| H | 6.12503600  | -0.22079200 | -1.46605900 |
| H | 4.46144200  | -0.51333600 | -1.95148800 |
| H | 5.81081400  | 2.10142900  | -1.69304900 |
| H | 4.12173300  | 1.86123300  | -2.14219000 |
| C | 2.16908900  | -2.84564700 | 1.39914800  |
| C | 2.31208200  | -4.19803400 | 1.72034600  |
| C | 2.68927300  | -5.11942400 | 0.73746400  |
| C | 2.91922900  | -4.67675500 | -0.56800300 |
| C | 2.77301600  | -3.32205900 | -0.88485700 |
| H | 1.87175100  | -2.14514600 | 2.17582800  |
| H | 2.12666900  | -4.53164700 | 2.73829200  |
| H | 2.80056400  | -6.17136700 | 0.98745900  |
| H | 3.21066600  | -5.38280100 | -1.34157400 |
| H | 2.95066000  | -2.98808000 | -1.90492300 |
| C | 5.33988800  | 1.06824000  | 0.88744600  |
| H | 6.41594500  | 1.19353700  | 0.71783600  |
| H | 5.14040900  | 1.13752800  | 1.96341600  |
| H | 5.15940200  | -1.15892400 | 0.60383900  |
| H | 4.62673300  | 3.10617600  | 0.22931800  |

|                                              |                             |
|----------------------------------------------|-----------------------------|
| Zero-point correction=                       | 0.545642 (Hartree/Particle) |
| Thermal correction to Energy=                | 0.577696                    |
| Thermal correction to Enthalpy=              | 0.578640                    |
| Thermal correction to Gibbs Free Energy=     | 0.478940                    |
| Sum of electronic and zero-point Energies=   | -2255.160527                |
| Sum of electronic and thermal Energies=      | -2255.128473                |
| Sum of electronic and thermal Enthalpies=    | -2255.127529                |
| Sum of electronic and thermal Free Energies= | -2255.227229                |

M06-2X/6-31+G(d)// B3LYP/6-31+G(d) (IEFPCM)

HF=-2255.0321409

**(P.S.R.R)-n**

B3LYP/6-31+G\* optimized with IEFPCM (dichloromethane;  $\epsilon=8.93$ )

|   |             |             |             |
|---|-------------|-------------|-------------|
| C | 1.41367100  | 2.53186300  | -0.27318500 |
| C | 1.58350700  | 3.32855300  | 0.87903200  |
| C | 2.14399900  | 4.60669700  | 0.74710000  |
| C | 2.53353500  | 5.07042700  | -0.51376500 |
| C | 2.37131300  | 4.27864800  | -1.65230400 |
| C | 1.80917700  | 3.00583600  | -1.52208100 |
| H | 2.28179100  | 5.24087300  | 1.61538000  |
| H | 2.96792000  | 6.06317100  | -0.59786500 |
| H | 2.67704500  | 4.64367400  | -2.62818600 |
| H | 1.67199200  | 2.36479800  | -2.38821100 |
| O | 1.17580200  | 2.77990900  | 2.05482700  |
| C | 1.33852100  | 3.53524200  | 3.25816900  |
| H | 0.95273800  | 2.89975300  | 4.05593200  |
| H | 0.76294400  | 4.46720500  | 3.21923100  |
| H | 2.39617800  | 3.75630900  | 3.44206900  |
| N | 2.91885300  | 0.13271500  | 0.08406700  |
| C | 3.65425000  | -1.05225700 | 0.27434500  |
| C | 4.14996400  | -1.38546700 | 1.54146200  |
| C | 4.95191300  | -2.51537100 | 1.73814400  |
| C | 5.27680900  | -3.32486400 | 0.65001400  |
| C | 4.80418900  | -3.00749900 | -0.63051300 |
| C | 3.99876100  | -1.87969900 | -0.82641800 |
| H | 3.89672000  | -0.73576000 | 2.37538100  |
| H | 5.31875600  | -2.75319200 | 2.73309500  |
| H | 5.90104600  | -4.20464100 | 0.78318400  |
| H | 5.06926300  | -3.64410800 | -1.46735000 |
| O | 3.50097800  | -1.49319800 | -2.04128500 |
| C | 3.82607800  | -2.27526100 | -3.18853800 |
| H | 3.33421200  | -1.78407200 | -4.02955600 |
| H | 3.44798200  | -3.30048000 | -3.09128600 |
| H | 4.90937400  | -2.29707700 | -3.36034700 |
| C | -3.19836600 | -0.22209000 | -0.81987800 |
| C | -4.73749300 | -0.29031200 | -0.60816200 |
| C | -2.98291200 | 1.28715000  | -1.21743500 |

|   |             |             |             |
|---|-------------|-------------|-------------|
| C | -4.40951000 | 1.88829400  | -1.17022100 |
| C | -5.17325600 | 0.47547300  | 0.66465700  |
| C | -4.93568900 | 1.97231600  | 0.28263100  |
| C | -2.30403900 | -0.77795800 | 0.32756500  |
| C | -0.87462800 | -0.32366300 | 0.13240100  |
| C | -0.53716600 | 0.96654600  | -0.06969200 |
| S | -1.74255100 | 2.24649500  | -0.21328400 |
| S | 0.57667800  | -1.33676700 | 0.24909200  |
| C | 1.63765800  | 0.10220300  | 0.05260500  |
| N | 0.84327400  | 1.22367300  | -0.14650400 |
| H | -2.64281700 | -0.31877400 | 1.26597400  |
| C | -2.45824000 | -2.28632600 | 0.48528500  |
| H | -2.60402900 | 1.33988700  | -2.24115300 |
| H | -2.95907100 | -0.81207700 | -1.71171100 |
| H | -6.23410400 | 0.28331100  | 0.86266100  |
| H | -4.62613500 | 0.17706000  | 1.56396100  |
| H | -5.87264400 | 2.54038200  | 0.30349100  |
| H | -4.23520700 | 2.47365100  | 0.95684800  |
| C | -2.15618100 | -3.17091700 | -0.56348400 |
| C | -2.30916600 | -4.55080200 | -0.40430200 |
| C | -2.76858700 | -5.07315200 | 0.80944200  |
| C | -3.07100100 | -4.20423000 | 1.86137200  |
| C | -2.91529200 | -2.82379800 | 1.69724200  |
| H | -1.79403100 | -2.78433500 | -1.51308200 |
| H | -2.06704300 | -5.21742400 | -1.22824600 |
| H | -2.88722800 | -6.14649000 | 0.93331900  |
| H | -3.42687300 | -4.59744400 | 2.81036900  |
| H | -3.15070700 | -2.15605900 | 2.52323900  |
| C | -5.21694400 | 0.68274600  | -1.71135900 |
| H | -6.29911200 | 0.85881000  | -1.69171900 |
| H | -4.92629900 | 0.37678100  | -2.72349900 |
| H | -5.12816000 | -1.31035600 | -0.66464500 |
| H | -4.49889000 | 2.82258900  | -1.73225000 |

|                                            |                             |
|--------------------------------------------|-----------------------------|
| Zero-point correction=                     | 0.545313 (Hartree/Particle) |
| Thermal correction to Energy=              | 0.577508                    |
| Thermal correction to Enthalpy=            | 0.578453                    |
| Thermal correction to Gibbs Free Energy=   | 0.477389                    |
| Sum of electronic and zero-point Energies= | -2255.160469                |
| Sum of electronic and thermal Energies=    | -2255.128274                |

Sum of electronic and thermal Enthalpies= -2255.127330  
Sum of electronic and thermal Free Energies= -2255.228394

M06-2X/6-31+G(d)// B3LYP/6-31+G(d) (IEFPCM)  
HF=-2255.0313833

**(M,S,S,S)-n**

B3LYP/6-31+G\* optimized with IEFPCM (dichloromethane;  $\epsilon=8.93$ )

|   |             |             |             |
|---|-------------|-------------|-------------|
| C | 1.67204700  | -2.19170600 | -0.74432900 |
| C | 1.94683300  | -3.07831600 | 0.31848400  |
| C | 2.74384200  | -4.20517400 | 0.07390800  |
| C | 3.25183700  | -4.43867500 | -1.20850400 |
| C | 2.97882000  | -3.56174800 | -2.25935500 |
| C | 2.18970400  | -2.43404400 | -2.01557100 |
| H | 2.97091900  | -4.90226900 | 0.87214100  |
| H | 3.86753200  | -5.31811700 | -1.37823500 |
| H | 3.37733100  | -3.74538100 | -3.25257400 |
| H | 1.97049700  | -1.72622700 | -2.81022600 |
| O | 1.40049400  | -2.76729800 | 1.52280700  |
| C | 1.66775600  | -3.62109400 | 2.63814300  |
| H | 1.14232000  | -3.17259200 | 3.48182700  |
| H | 2.74179400  | -3.66177900 | 2.85271900  |
| H | 1.28383700  | -4.63250600 | 2.46109700  |
| C | -3.50889800 | -0.55606500 | -0.45596400 |
| C | -3.96005900 | -0.66074700 | 1.02841600  |
| C | -3.07536700 | -2.04111200 | -0.77169500 |
| C | -3.37677900 | -2.80186600 | 0.54707000  |
| C | -2.78401200 | -0.93898000 | 1.99777900  |
| C | -4.64766100 | -2.04728100 | 1.00316000  |
| C | -2.38203100 | -2.41117800 | 1.66135000  |
| C | -2.51056600 | 0.55553900  | -0.91367200 |
| C | -1.08351300 | 0.24321400  | -0.52999600 |
| C | -0.50939200 | -0.95011200 | -0.78484900 |
| S | -1.38037000 | -2.31330200 | -1.49022700 |
| S | 0.11709300  | 1.38479800  | 0.10661200  |
| C | 1.41737800  | 0.15033400  | -0.02840700 |
| N | 0.86748800  | -1.02856000 | -0.51231200 |
| H | -2.53653300 | 0.49378000  | -2.01315400 |
| C | -2.99606700 | 1.95898000  | -0.56833600 |

|   |             |             |             |
|---|-------------|-------------|-------------|
| H | -3.70808200 | -2.44377100 | -1.56806400 |
| H | -4.41737700 | -0.36114000 | -1.04032300 |
| H | -4.59641900 | 0.17444000  | 1.33261800  |
| H | -3.47596500 | -3.88059900 | 0.39438800  |
| H | -1.94786500 | -0.24619700 | 1.88202100  |
| H | -3.13763500 | -0.85147100 | 3.03231300  |
| H | -4.99955400 | -2.36999100 | 1.99056700  |
| H | -5.48058900 | -2.11176700 | 0.29258000  |
| H | -1.33837200 | -2.50610700 | 1.35142800  |
| H | -2.52409500 | -3.06843300 | 2.52732800  |
| C | -3.53743200 | 2.76088200  | -1.58568600 |
| C | -4.01797800 | 4.04631400  | -1.31818800 |
| C | -3.96114400 | 4.55805400  | -0.01884500 |
| C | -3.42242400 | 3.77263900  | 1.00492400  |
| C | -2.94769800 | 2.48620200  | 0.73299600  |
| H | -3.57881400 | 2.37582000  | -2.60253000 |
| H | -4.42998500 | 4.64664800  | -2.12547200 |
| H | -4.32929200 | 5.55841200  | 0.19383300  |
| H | -3.37057700 | 4.15956500  | 2.01957100  |
| H | -2.53777300 | 1.89509700  | 1.54562900  |
| N | 2.65406300  | 0.28467300  | 0.28214500  |
| C | 3.14472900  | 1.52540100  | 0.72985000  |
| C | 3.40096900  | 1.73679200  | 2.09078900  |
| C | 3.96076100  | 2.93384800  | 2.55168900  |
| C | 4.28449000  | 3.93713300  | 1.63879600  |
| C | 4.05247500  | 3.74597900  | 0.27000800  |
| C | 3.48946600  | 2.55018100  | -0.19066400 |
| H | 3.15320900  | 0.93894300  | 2.78630700  |
| H | 4.14261600  | 3.07349700  | 3.61401000  |
| H | 4.72224700  | 4.87232000  | 1.97824700  |
| H | 4.31473200  | 4.53322100  | -0.42821800 |
| O | 3.24022000  | 2.27630600  | -1.50768900 |
| C | 3.56152400  | 3.26783800  | -2.48102900 |
| H | 3.28329500  | 2.83695200  | -3.44402500 |
| H | 4.63486000  | 3.49456300  | -2.47827600 |
| H | 2.98991800  | 4.18890400  | -2.31309800 |

|                                 |                             |
|---------------------------------|-----------------------------|
| Zero-point correction=          | 0.545862 (Hartree/Particle) |
| Thermal correction to Energy=   | 0.577785                    |
| Thermal correction to Enthalpy= | 0.578729                    |



Thermal correction to Gibbs Free Energy= 0.479574  
 Sum of electronic and zero-point Energies= -2255.155086  
 Sum of electronic and thermal Energies= -2255.123163  
 Sum of electronic and thermal Enthalpies= -2255.122219  
 Sum of electronic and thermal Free Energies= -2255.221374

M06-2X/6-31+G(d)// B3LYP/6-31+G(d) (IEFPCM)  
 HF=-2255.0307723

**(P.S.S.S)-n**

B3LYP/6-31+G\* optimized with IEFPCM (dichloromethane;  $\epsilon=8.93$ )

|   |             |             |             |
|---|-------------|-------------|-------------|
| C | 2.01603100  | -2.04163800 | 0.05077300  |
| C | 2.56482000  | -2.64241800 | -1.10218900 |
| C | 3.51847900  | -3.65897600 | -0.95279700 |
| C | 3.92051800  | -4.05580000 | 0.32680000  |
| C | 3.38430100  | -3.45401500 | 1.46683900  |
| C | 2.42954400  | -2.44443100 | 1.31881200  |
| H | 3.95209700  | -4.13954500 | -1.82220100 |
| H | 4.66253200  | -4.84392600 | 0.42445200  |
| H | 3.70213400  | -3.76401500 | 2.45776500  |
| H | 1.99674400  | -1.95512000 | 2.18652600  |
| O | 2.11072900  | -2.17770800 | -2.29676600 |
| C | 2.63003400  | -2.75196800 | -3.49935900 |
| H | 2.12670700  | -2.22908400 | -4.31316300 |
| H | 2.40366700  | -3.82309900 | -3.55390900 |
| H | 3.71219100  | -2.59470500 | -3.57389400 |
| C | -3.34323400 | -1.16536700 | -0.03211100 |
| C | -3.76217800 | -0.76269600 | 1.41002900  |
| C | -2.69586800 | -2.58572400 | 0.20029600  |
| C | -2.88199800 | -2.83273300 | 1.72118700  |
| C | -2.55194400 | -0.50285500 | 2.34213700  |
| C | -4.24569000 | -2.13514500 | 1.93955600  |
| C | -1.94981900 | -1.92877700 | 2.55579000  |
| C | -2.52761000 | -0.18289800 | -0.93473100 |
| C | -1.06834400 | -0.12364100 | -0.55117400 |
| C | -0.32383600 | -1.23084600 | -0.35765100 |
| S | -0.97940800 | -2.86532300 | -0.46007900 |
| S | -0.05998900 | 1.33174000  | -0.43258100 |
| C | 1.40739000  | 0.33528100  | -0.14095900 |

|   |             |             |             |
|---|-------------|-------------|-------------|
| N | 1.03894300  | -1.00290500 | -0.09179300 |
| H | -2.55009200 | -0.65854300 | -1.92783300 |
| C | -3.22192600 | 1.16387300  | -1.10531900 |
| H | -3.26118700 | -3.34010200 | -0.35452000 |
| H | -4.27551300 | -1.33000900 | -0.58754700 |
| H | -4.50830200 | 0.03593900  | 1.42244500  |
| H | -2.82729300 | -3.89343600 | 1.98311400  |
| H | -1.82232800 | 0.19602200  | 1.92764400  |
| H | -2.90730400 | -0.07830900 | 3.28885800  |
| H | -4.54302300 | -2.10925200 | 2.99497300  |
| H | -5.06419600 | -2.56794300 | 1.35182300  |
| H | -0.90412600 | -2.00200600 | 2.24468300  |
| H | -1.99419300 | -2.22550700 | 3.61002800  |
| C | -3.88787200 | 1.43880000  | -2.31034100 |
| C | -4.56250300 | 2.64758700  | -2.50728600 |
| C | -4.57911500 | 3.61238000  | -1.49625900 |
| C | -3.91822900 | 3.35469100  | -0.29125400 |
| C | -3.24981000 | 2.14221400  | -0.09731300 |
| H | -3.87489800 | 0.69820200  | -3.10739500 |
| H | -5.06843300 | 2.83494100  | -3.45110500 |
| H | -5.09858800 | 4.55539000  | -1.64571300 |
| H | -3.92218800 | 4.09723400  | 0.50279900  |
| H | -2.74922200 | 1.96441900  | 0.84917900  |
| N | 2.61409100  | 0.74633400  | -0.00517800 |
| C | 2.91055800  | 2.12147200  | -0.03760000 |
| C | 3.50042900  | 2.68933600  | -1.17447400 |
| C | 3.87800400  | 4.03639300  | -1.20650400 |
| C | 3.67677800  | 4.83347300  | -0.07993700 |
| C | 3.10247700  | 4.28736700  | 1.07574300  |
| C | 2.72103000  | 2.94101000  | 1.10640200  |
| H | 3.66026000  | 2.04999200  | -2.03896400 |
| H | 4.32709500  | 4.45208100  | -2.10461600 |
| H | 3.96651800  | 5.88105200  | -0.08573400 |
| H | 2.95811500  | 4.91786000  | 1.94618100  |
| O | 2.16492000  | 2.32590800  | 2.19513000  |
| C | 1.95548900  | 3.09564700  | 3.37711600  |
| H | 1.51253400  | 2.41015700  | 4.10119000  |
| H | 1.26597700  | 3.92848900  | 3.19183700  |
| H | 2.90277200  | 3.48297000  | 3.77221300  |

|                                              |                             |
|----------------------------------------------|-----------------------------|
| Zero-point correction=                       | 0.545941 (Hartree/Particle) |
| Thermal correction to Energy=                | 0.577833                    |
| Thermal correction to Enthalpy=              | 0.578778                    |
| Thermal correction to Gibbs Free Energy=     | 0.479604                    |
| Sum of electronic and zero-point Energies=   | -2255.155153                |
| Sum of electronic and thermal Energies=      | -2255.123261                |
| Sum of electronic and thermal Enthalpies=    | -2255.122317                |
| Sum of electronic and thermal Free Energies= | -2255.221490                |

M06-2X/6-31+G(d)// B3LYP/6-31+G(d) (IEFPCM)

HF=-2255.030698
